# Supplementary material for: Soft Sensing of Non-Newtonian Fluid Flow in Open Venturi Channel Using an Array of Ultrasonic Level Sensors—AI Models and Their Validations
Source: Sensors (Basel). 2017 Oct 26;17(11):2458. doi: 10.3390/s17112458 (PMC5713661; doi:10.3390/s17112458)
Supplement: Supplementary file 1 [file sensors-17-02458-s001.zip]

Archive with 25 entries (25 files):
- Data Set/Main Data Set.txt
- Data Set/Repeatability Test Data Experiment #1.txt
- Data Set/Repeatability Test Data Experiment #2.txt
- Data Set/Repeatability Test Data Experiment #3.txt
- Figures/Figure_10.eps
- Figures/Figure_11.eps
- Figures/Figure_12_a.eps
- Figures/Figure_12_b.eps
- Figures/Figure_13.eps
- Figures/Figure_14.PNG
- Figures/Figure_1a.png
- Figures/Figure_1b.PNG
- Figures/Figure_2_a.eps
- Figures/Figure_2_b.eps
- Figures/Figure_3.png
- Figures/Figure_4_a.eps
- Figures/Figure_4_b.eps
- Figures/Figure_5.PNG
- Figures/Figure_6.PNG
- Figures/Figure_7.PNG
- Figures/Figure_8.PNG
- Figures/Figure_9.PNG
- Highlights/Highlights.docx
- Highlights/Highlights.pdf
- Video Document/Flow_Rate_Estimation_Experiment.mp4
