# Supplementary material for: Soft Sensing of Non-Newtonian Fluid Flow in Open Venturi Channel Using an Array of Ultrasonic Level Sensors—AI Models and Their Validations
Source: Sensors (Basel). 2017 Oct 26;17(11):2458. doi: 10.3390/s17112458 (PMC5713661; doi:10.3390/s17112458)
Supplement: Supplementary file 1 [file sensors-17-02458-s001.zip › Data Set/Main Data Set.txt]

This document consist of the data set used in our work. There are four columns representing four different sensor measurements.
First three columns are three ultrasonic level measurements (all in [mm] units) at different positions in Open Venturi Channel,
which are considered as inputs to the Artificial Intelligence models. The fourth column is Coriolis mass flow readings (in [kg/min] units),
which is considered as output of the models.
In case of any confusion, please contact by email: khim.chhantyal@usn.no, kabirkhim@gmail.com
37.1758320000000	44.3861320000000	37.3496380000000	250.216052000000
46.1919340000000	55.1174700000000	42.4345960000000	250.254899000000
45.7786570000000	52.2624030000000	41.2111250000000	249.785125000000
45.8023190000000	58.6423110000000	41.6561170000000	251.306891000000
55.4519240000000	61.4192080000000	38.9385900000000	250.150323000000
59.6099690000000	63.9365920000000	41.4062240000000	250.780240000000
54.7872730000000	67.6657220000000	43.2192070000000	249.659240000000
60.2056780000000	66.8512060000000	41.9341160000000	248.834431000000
62.9135110000000	68.0903550000000	41.8666530000000	250.613049000000
62.7623700000000	68.8921540000000	44.8240130000000	249.178320000000
63.9956430000000	68.8332740000000	41.4021450000000	251.217395000000
65.7402220000000	62.8790660000000	38.4557510000000	251.893044000000
67.7551740000000	64.3046330000000	37.2465760000000	249.846756000000
67.2078780000000	68.4435640000000	41.0187150000000	250.517324000000
65.3612550000000	68.3841530000000	40.8306050000000	248.068303000000
64.8268740000000	68.0168940000000	41.9988570000000	250.003949000000
68.2027880000000	67.0316060000000	42.5963810000000	250.263423000000
67.0035230000000	68.7287730000000	44.5773380000000	251.892388000000
66.1052890000000	66.5508240000000	43.8149060000000	249.586299000000
69.2351580000000	66.5139340000000	41.3606490000000	249.896586000000
67.3607650000000	68.6621640000000	43.7790880000000	250.521421000000
68.1483270000000	69.3139420000000	41.8958130000000	249.969691000000
65.4642350000000	66.1627400000000	43.7604080000000	251.584396000000
62.2663570000000	67.2808950000000	42.2198160000000	249.666944000000
62.5169330000000	68.2586050000000	43.4816750000000	248.765260000000
67.3228540000000	68.9053510000000	44.9921160000000	248.630688000000
66.6246930000000	69.1525430000000	45.6765440000000	249.133736000000
68.8428390000000	67.6291570000000	44.5809700000000	251.500964000000
66.9711350000000	67.9326280000000	32.8087030000000	249.210775000000
64.1223120000000	69.4279850000000	36.8125230000000	249.981657000000
67.2652020000000	69.6738030000000	39.7776230000000	248.477265000000
68.1520490000000	65.9316400000000	42.0672680000000	250.998735000000
63.5856170000000	67.4069130000000	44.8693680000000	250.513554000000
63.3250890000000	66.3190100000000	44.5873930000000	248.430878000000
63.4504520000000	68.3662220000000	42.9883840000000	249.454349000000
60.6994800000000	68.5779660000000	42.9183500000000	249.350756000000
62.5816570000000	66.3489690000000	42.1522800000000	251.623899000000
68.5499460000000	68.2648090000000	44.2041520000000	248.860165000000
66.9039810000000	65.4272180000000	45.1453610000000	251.525387000000
58.8367690000000	66.6579580000000	43.5714270000000	249.255523000000
65.8833810000000	68.2937890000000	39.0738710000000	250.063449000000
68.2313500000000	69.6027490000000	36.4790170000000	250.905961000000
62.8751390000000	68.2599020000000	41.4718010000000	249.070957000000
65.0902620000000	69.7882830000000	39.1455060000000	250.052631000000
66.9788980000000	70.8175940000000	42.7257900000000	249.430254000000
64.7538080000000	66.3428430000000	41.2404940000000	250.621736000000
65.6350770000000	68.0753130000000	43.6978840000000	250.487328000000
68.4623940000000	68.1939490000000	40.3566600000000	248.452842000000
67.9887740000000	68.9551560000000	35.1640410000000	250.977263000000
67.7091080000000	67.0645210000000	37.3796420000000	249.281257000000
68.2509550000000	67.3696680000000	41.2901240000000	249.888226000000
62.0618210000000	67.9188400000000	40.0847860000000	250.606984000000
66.2312700000000	67.8890850000000	43.2795080000000	249.219462000000
67.8964010000000	69.1553880000000	44.8373340000000	251.022503000000
70.2721690000000	66.8847730000000	43.3242650000000	249.016702000000
68.7520000000000	61.5688900000000	41.8515110000000	250.048861000000
66.2498510000000	65.5458960000000	42.7670980000000	250.007719000000
61.9642640000000	65.4754020000000	41.9576210000000	248.487592000000
68.0923150000000	68.8203670000000	41.9693580000000	249.764964000000
67.4479250000000	68.1241900000000	43.9129520000000	250.355542000000
70.0651210000000	67.6382480000000	45.1381780000000	250.152454000000
65.8007420000000	68.6162880000000	43.9989710000000	251.512274000000
65.5735470000000	63.6110120000000	43.2331850000000	251.416221000000
66.4072340000000	66.6932810000000	39.9860400000000	250.333577000000
63.5132870000000	65.1880240000000	38.6794610000000	250.038043000000
66.6051230000000	67.9285380000000	32.2735050000000	249.315843000000
61.4475510000000	66.4605650000000	34.9366530000000	250.971526000000
63.9274290000000	65.8498120000000	38.4094470000000	249.847412000000
66.3149130000000	69.1565840000000	40.9817230000000	250.510275000000
65.8895260000000	67.5707710000000	42.6723040000000	250.431105000000
64.1294610000000	67.8367960000000	41.4146610000000	249.943957000000
67.6830640000000	67.1860710000000	39.9646770000000	249.964774000000
65.9236470000000	68.1939190000000	39.5302430000000	249.236837000000
64.9908990000000	69.5758430000000	40.8853580000000	250.213102000000
67.4892370000000	68.6159620000000	44.6757900000000	250.504866000000
62.7567530000000	66.4951980000000	45.0906740000000	250.722542000000
62.5970750000000	66.7664580000000	44.8544250000000	249.541223000000
64.4265780000000	65.9937140000000	43.4455510000000	249.868721000000
63.2016540000000	67.7558830000000	42.4857260000000	248.763293000000
64.5100480000000	65.0591260000000	42.0460710000000	250.229001000000
67.4361500000000	65.1634870000000	42.7121280000000	249.562532000000
63.4309340000000	65.8753200000000	42.6968000000000	249.363542000000
66.5022660000000	69.1420830000000	45.1220780000000	251.270831000000
67.8259400000000	68.8351740000000	43.9067680000000	250.050172000000
66.1098990000000	68.4438660000000	39.8849970000000	249.894619000000
62.4459770000000	68.4809330000000	41.3508250000000	250.540271000000
64.3541860000000	67.6502980000000	44.8117500000000	251.018405000000
65.8011410000000	67.4959900000000	42.8847610000000	249.297157000000
64.8509460000000	68.0913560000000	37.4479530000000	251.550630000000
64.6333390000000	68.9516210000000	42.3910310000000	250.503063000000
64.0825220000000	69.6303980000000	43.5359740000000	250.690743000000
64.8508540000000	69.1684780000000	45.7772870000000	250.453725000000
70.0248400000000	69.2040380000000	43.3744890000000	250.157207000000
68.4696390000000	68.5263980000000	42.6210800000000	249.628425000000
68.4609100000000	69.7328920000000	44.2886810000000	249.050796000000
65.1844350000000	64.2964780000000	43.5724060000000	249.646783000000
62.8429810000000	66.5951930000000	39.2407560000000	251.263127000000
61.1365230000000	68.4088940000000	42.4701900000000	249.410093000000
63.9168620000000	58.7998000000000	44.4333710000000	250.358656000000
66.0978980000000	62.8446170000000	44.9467450000000	250.084922000000
62.1564980000000	67.0354060000000	44.2098890000000	249.946907000000
59.9154960000000	65.7375320000000	44.6992080000000	250.804007000000
59.5931420000000	67.9663410000000	43.2117250000000	249.590397000000
65.6708850000000	65.8448460000000	40.6585790000000	249.106526000000
69.2473590000000	68.1258790000000	32.4594560000000	251.140356000000
67.2128390000000	67.3670460000000	39.0534210000000	248.947531000000
61.7905050000000	68.4357960000000	41.5998900000000	249.228805000000
65.7433750000000	68.5887890000000	44.8096200000000	249.492541000000
64.5269770000000	68.1699340000000	46.0489320000000	250.979722000000
67.7125760000000	67.5446540000000	40.2597180000000	248.977035000000
60.9641730000000	65.8630440000000	41.3709820000000	251.419500000000
63.4139230000000	66.9364900000000	44.0195750000000	249.376982000000
62.2598440000000	67.0224110000000	42.4750350000000	249.828890000000
67.1482990000000	64.3715810000000	40.1076130000000	250.957921000000
62.6591740000000	68.1022400000000	39.3225790000000	250.552401000000
68.5469660000000	65.3096020000000	43.2637290000000	249.708086000000
61.1877250000000	65.6262700000000	43.4743980000000	249.841020000000
66.6916640000000	67.4521870000000	43.7064140000000	249.276996000000
69.2345690000000	68.1207640000000	36.2352750000000	249.337479000000
61.6144070000000	64.5643340000000	41.1353410000000	250.755325000000
58.9966240000000	65.9733810000000	39.4918760000000	249.484017000000
65.3617400000000	66.1641790000000	37.5942290000000	250.915468000000
63.8812190000000	68.9282810000000	40.2404970000000	250.719428000000
61.5834600000000	68.7428820000000	41.7214150000000	249.351084000000
65.0441440000000	66.9653450000000	40.2927590000000	250.078693000000
63.7812940000000	68.5640040000000	42.4702200000000	249.671042000000
65.7939850000000	66.3922360000000	38.6481270000000	250.004768000000
64.2005780000000	68.5587860000000	38.3936340000000	249.298960000000
66.3075880000000	69.8871720000000	40.2739940000000	250.644028000000
68.2803840000000	70.1739340000000	43.7851800000000	249.913469000000
66.3044530000000	68.6219530000000	42.8301360000000	250.129178000000
65.0660380000000	66.1464690000000	42.8469700000000	250.136390000000
67.0676130000000	68.2791130000000	41.2329990000000	249.485984000000
63.2541260000000	68.7095130000000	40.7600190000000	249.791518000000
63.5729020000000	68.2559830000000	42.4563790000000	250.323087000000
69.8082090000000	70.0031140000000	41.6269230000000	249.568105000000
67.1594810000000	66.4473580000000	44.4921900000000	251.253784000000
66.1956320000000	64.8915780000000	45.2719970000000	249.306992000000
65.0951610000000	68.5905230000000	44.6053340000000	249.924123000000
68.4142650000000	67.6290590000000	42.1401600000000	250.570431000000
64.2092510000000	67.1581690000000	44.9775170000000	251.262471000000
63.4763500000000	67.6660490000000	45.1433480000000	249.594167000000
63.8622610000000	68.5980360000000	44.3918270000000	251.143962000000
68.3443520000000	69.9175820000000	45.0235160000000	249.820203000000
67.2170320000000	66.0160370000000	42.9404740000000	249.984771000000
63.9515480000000	66.1405160000000	38.6759820000000	250.202611000000
65.1209180000000	68.4064300000000	39.8047290000000	250.756472000000
62.0923080000000	68.0863420000000	38.8131760000000	249.305189000000
64.7564150000000	67.7705930000000	42.1629750000000	251.084626000000
65.0851450000000	69.2312480000000	40.6809340000000	249.406815000000
66.0101490000000	69.1221120000000	44.4465250000000	249.515161000000
68.3914920000000	68.5949880000000	45.1018530000000	248.192385000000
67.4830080000000	67.3528920000000	41.4092470000000	250.880063000000
62.0151190000000	66.1232430000000	42.6522420000000	249.786764000000
65.2036640000000	68.8051380000000	45.3493190000000	249.025717000000
67.8469710000000	67.7449980000000	44.0257130000000	250.167862000000
67.2889890000000	67.1742820000000	43.7746350000000	249.284536000000
62.3680710000000	67.8501800000000	39.5565030000000	249.379441000000
64.5899440000000	69.5685320000000	39.4724040000000	250.039846000000
66.8518020000000	71.0265770000000	41.3413440000000	264.847070000000
65.5294930000000	69.4549010000000	41.7370720000000	274.040446000000
66.1815240000000	70.5280960000000	42.2446740000000	274.940491000000
66.7254760000000	68.3401620000000	46.1759130000000	275.111780000000
71.6184260000000	68.1442970000000	41.9924340000000	275.856271000000
72.6095540000000	69.3470010000000	41.8979120000000	275.215209000000
70.4866680000000	70.7269490000000	45.6288100000000	274.885088000000
68.9853320000000	70.2204770000000	44.7509420000000	273.749828000000
69.5154400000000	69.4785950000000	43.5742090000000	275.866762000000
73.9748920000000	70.0165440000000	45.7403130000000	275.372565000000
74.0607540000000	72.9663020000000	43.7120340000000	275.147840000000
69.4210380000000	72.1334390000000	45.2762910000000	275.360927000000
70.6311070000000	71.7836310000000	45.3882220000000	274.730682000000
73.8210220000000	72.4991410000000	42.0462190000000	274.500057000000
72.1433800000000	72.9567170000000	43.5276620000000	276.541099000000
69.5135640000000	70.4156890000000	47.1161870000000	273.778185000000
69.8357740000000	71.2457810000000	46.7496730000000	273.286939000000
71.8591340000000	71.9768300000000	46.8717190000000	275.553197000000
69.8732480000000	71.7289290000000	44.1259980000000	274.931803000000
73.7691410000000	72.6256590000000	44.6321830000000	274.246976000000
74.0244180000000	72.0198780000000	45.7955040000000	275.211439000000
72.0203300000000	67.6145620000000	48.1674440000000	274.329588000000
70.6330130000000	71.4629650000000	45.7859830000000	274.742812000000
69.0739210000000	72.1373980000000	46.8047050000000	274.977207000000
67.2485870000000	72.3176570000000	46.0080510000000	276.221141000000
69.5140410000000	70.9968070000000	44.8888680000000	273.635909000000
67.5433390000000	70.7500460000000	44.3280490000000	274.835587000000
74.3832420000000	69.5334700000000	44.7283830000000	275.399938000000
74.0264700000000	72.3181660000000	45.1493280000000	274.100766000000
70.3074330000000	67.9599900000000	45.4924300000000	275.574833000000
63.7600010000000	70.1568140000000	43.5383450000000	275.638923000000
70.1708690000000	70.9780850000000	44.6740680000000	274.101585000000
72.2709160000000	72.0921700000000	39.8275440000000	274.810016000000
72.6127930000000	71.9594790000000	44.0145480000000	275.641710000000
70.7783450000000	69.4109670000000	46.4467340000000	275.436491000000
70.5813210000000	69.5017420000000	43.5178520000000	274.619713000000
71.8629130000000	70.5477050000000	45.0778040000000	275.367647000000
68.3516700000000	70.9206890000000	40.9690250000000	274.472520000000
72.2936560000000	71.3172300000000	39.9539790000000	275.392234000000
72.4871400000000	73.3659770000000	45.6884900000000	274.986878000000
72.2458620000000	74.2053020000000	46.1900550000000	275.209799000000
69.2430060000000	74.3257880000000	44.0525500000000	274.879515000000
69.3717260000000	73.8923920000000	43.3931460000000	275.778741000000
68.2056630000000	74.0131450000000	46.7929480000000	273.583621000000
73.6853540000000	73.0955010000000	47.2564940000000	275.967076000000
70.7705340000000	71.8680360000000	43.9218910000000	274.618238000000
72.1495280000000	72.2324510000000	44.8220120000000	273.423806000000
69.4147890000000	73.7401630000000	38.4739410000000	275.422394000000
65.0118340000000	72.7276450000000	37.0824410000000	275.516644000000
67.8081130000000	70.9798880000000	37.7015770000000	274.750516000000
71.5722230000000	72.4567040000000	43.8616570000000	275.917247000000
68.0887800000000	71.3538830000000	45.3279330000000	274.607584000000
66.8906300000000	72.3386970000000	44.0450040000000	274.340734000000
73.0360840000000	69.7297680000000	45.2596110000000	275.201276000000
71.3613080000000	67.6851290000000	45.1647880000000	273.518384000000
65.7380770000000	70.1083560000000	46.6518090000000	274.611518000000
72.9949650000000	72.5356480000000	48.3565670000000	274.514318000000
67.2553640000000	73.6860530000000	44.4213850000000	275.356993000000
69.3072330000000	73.6670420000000	46.3760990000000	275.760874000000
72.9279080000000	73.6945210000000	47.3163230000000	275.877088000000
72.0410520000000	73.3309830000000	46.9563510000000	273.869812000000
72.2948950000000	73.5469440000000	46.1895930000000	274.803132000000
71.8765770000000	73.6844910000000	45.0946690000000	274.775758000000
73.6420930000000	74.6505980000000	44.0894540000000	273.291528000000
71.8897210000000	73.5093950000000	45.6327570000000	275.411904000000
67.0291930000000	69.8708680000000	46.5656660000000	276.677474000000
60.6234460000000	71.8876650000000	45.6636180000000	273.461014000000
71.5882710000000	71.1723330000000	45.8731750000000	274.773791000000
73.6575870000000	72.8252940000000	43.9123660000000	275.108829000000
72.3961330000000	72.6297510000000	42.9817520000000	275.790051000000
72.0279160000000	68.0392070000000	44.0383750000000	274.971634000000
71.4900150000000	68.7227040000000	43.0637980000000	274.423346000000
74.7307290000000	70.9464730000000	44.2085060000000	275.173903000000
69.2005880000000	72.4328570000000	45.0392590000000	275.582701000000
62.2760330000000	70.9197820000000	43.9480590000000	274.429083000000
66.0380210000000	70.3204930000000	45.5151200000000	275.775626000000
71.6834200000000	71.8784070000000	46.2531830000000	275.564179000000
70.9135290000000	71.2846150000000	47.6048030000000	274.243534000000
72.8214750000000	73.3322320000000	47.2586610000000	274.994254000000
71.3197670000000	74.5921270000000	47.3277510000000	275.728419000000
71.5685480000000	72.7566840000000	46.1285200000000	275.493369000000
70.8170470000000	73.0718470000000	46.6322690000000	276.051164000000
72.0367580000000	72.9706480000000	45.7826580000000	275.855288000000
69.7078030000000	71.4466220000000	47.1519630000000	274.772316000000
71.1098180000000	71.8184190000000	47.5295190000000	275.597945000000
72.6361560000000	73.4867850000000	43.0796830000000	275.353715000000
72.4992420000000	70.5511860000000	43.0998980000000	274.502188000000
71.0988680000000	70.8278710000000	45.4885390000000	275.361255000000
65.6043140000000	70.8768220000000	45.2269260000000	275.331587000000
63.3838770000000	70.0756410000000	45.1777410000000	276.083454000000
67.4292860000000	67.5065870000000	44.7140030000000	273.840472000000
66.2099370000000	67.9407940000000	45.2770110000000	275.135383000000
64.5692560000000	68.3955270000000	47.9779810000000	276.131645000000
72.0739610000000	72.2828210000000	44.2241330000000	274.838209000000
72.6521180000000	70.2952200000000	48.4375080000000	274.733797000000
72.5833770000000	72.4728520000000	47.4516530000000	275.264055000000
71.2387460000000	72.5925760000000	46.7631980000000	275.360927000000
72.1188400000000	73.0147770000000	43.4206390000000	274.083555000000
67.8722760000000	68.9029570000000	40.7544020000000	274.717078000000
69.7429370000000	71.0451720000000	42.3348300000000	275.116205000000
68.8964020000000	71.2584070000000	45.1188380000000	275.574997000000
71.3219160000000	72.2096800000000	45.0761540000000	275.889874000000
70.8231470000000	73.3168660000000	46.6114790000000	274.620205000000
74.2604470000000	73.1911990000000	46.1045330000000	275.371581000000
70.8926820000000	74.3517420000000	43.2176160000000	276.499957000000
68.9314640000000	72.4272720000000	45.8471850000000	275.783822000000
71.4110810000000	69.5258540000000	46.6718880000000	273.897350000000
70.9398170000000	71.2316820000000	45.3862980000000	275.315687000000
70.3012750000000	73.1482760000000	45.8433030000000	275.433376000000
73.6485960000000	70.7298560000000	43.3257730000000	276.244417000000
72.9623460000000	71.9984730000000	43.1454160000000	274.852306000000
72.1312230000000	72.0248870000000	40.6192420000000	275.149152000000
70.2764110000000	73.2253890000000	44.6324550000000	275.714979000000
72.5388980000000	74.0893690000000	45.4025860000000	273.975864000000
72.8316240000000	72.1213350000000	44.8499500000000	275.056213000000
73.7996820000000	72.5708730000000	49.2009020000000	276.047230000000
73.2775420000000	70.1697900000000	47.8305090000000	275.779068000000
73.9856340000000	72.7261940000000	48.5550680000000	274.493665000000
71.5646690000000	73.5830310000000	47.4400770000000	274.094045000000
70.7001200000000	72.1153730000000	47.3284830000000	276.095584000000
71.8864520000000	71.5144080000000	45.9117070000000	275.483698000000
73.8252350000000	71.0507640000000	46.1441100000000	273.400530000000
71.5681020000000	72.0569220000000	45.5318500000000	274.499401000000
70.7471150000000	72.3749340000000	45.0840280000000	274.630204000000
69.9533850000000	71.2237710000000	45.6746630000000	274.462521000000
67.1049590000000	71.9018050000000	43.3667940000000	274.197474000000
74.2758280000000	70.6952980000000	45.6383830000000	274.557918000000
68.9368870000000	71.6432580000000	46.4119170000000	275.092110000000
70.3019600000000	68.2900310000000	40.9426650000000	274.673805000000
63.5949020000000	70.3896280000000	44.2085260000000	275.816441000000
74.1294400000000	72.5806680000000	43.8778230000000	274.665609000000
62.2419500000000	71.9190950000000	44.2316760000000	274.471208000000
68.0445310000000	67.9944670000000	47.6780030000000	276.004121000000
69.6735950000000	71.6649930000000	48.1912910000000	275.155708000000
71.9595580000000	73.8263820000000	46.4573380000000	274.816409000000
73.7110260000000	73.4831920000000	47.6946740000000	274.002746000000
68.9714710000000	72.3750560000000	46.1560100000000	274.566114000000
64.8811260000000	72.8856950000000	41.2559640000000	276.050180000000
71.3107470000000	72.1508730000000	43.6518950000000	275.869548000000
71.3355320000000	72.1027160000000	41.5985850000000	274.246156000000
74.4573030000000	71.6121410000000	40.8214080000000	274.266809000000
73.2772780000000	71.8908010000000	42.9412270000000	275.691539000000
72.4202600000000	72.8054980000000	45.4923950000000	274.852961000000
69.5173100000000	72.2311410000000	44.7847470000000	273.887843000000
70.0893740000000	71.1530280000000	46.5891060000000	275.295526000000
72.9182440000000	71.6095460000000	37.0919110000000	275.178164000000
73.3104410000000	72.9432150000000	42.1898440000000	275.408953000000
73.9969840000000	72.0379210000000	45.2090920000000	275.938064000000
68.5379180000000	72.6385300000000	45.6511560000000	275.611222000000
68.1651090000000	73.1444730000000	44.9219450000000	275.168821000000
73.0008040000000	73.5965040000000	42.2029760000000	274.642825000000
72.7508850000000	72.2322960000000	45.6329430000000	274.397939000000
70.5529080000000	70.7942320000000	48.1681440000000	274.700850000000
72.1881150000000	69.6502090000000	44.5429830000000	275.146529000000
71.4521610000000	69.7762480000000	43.0786390000000	273.568049000000
71.1446540000000	69.6702760000000	43.4541540000000	276.068211000000
71.3115880000000	64.9135430000000	44.3522950000000	275.102928000000
71.7398200000000	69.2191980000000	46.0353360000000	274.780348000000
72.4132060000000	71.1522520000000	45.5094500000000	276.117548000000
72.4801750000000	71.4068700000000	44.8039610000000	276.048869000000
72.6328850000000	72.3166560000000	43.0351020000000	298.414439000000
73.6443090000000	73.9403040000000	43.7166870000000	298.194796000000
72.4712020000000	74.2806440000000	44.1399950000000	300.595298000000
74.6226430000000	75.7429510000000	45.0198110000000	299.743444000000
76.5379940000000	74.8964640000000	40.9448800000000	299.740165000000
76.8179390000000	73.7013510000000	44.2703660000000	301.013768000000
74.6220730000000	73.6533500000000	46.3568210000000	299.539208000000
73.2511070000000	75.0000520000000	47.0641970000000	300.814122000000
73.8217120000000	75.8576460000000	46.9652940000000	298.363134000000
74.8487090000000	76.3546290000000	47.0720180000000	300.406635000000
75.2783780000000	76.7557280000000	49.9180210000000	299.691975000000
74.3072500000000	76.0524930000000	43.3494030000000	300.011933000000
75.8580710000000	72.4510240000000	46.9556870000000	301.139817000000
71.8237480000000	75.8813160000000	40.8833970000000	300.320908000000
72.3653190000000	76.8678130000000	44.3728870000000	299.366444000000
72.8716590000000	77.0609920000000	46.3362160000000	299.815238000000
73.2829190000000	75.4735230000000	47.6332630000000	300.494820000000
68.4859660000000	74.2262480000000	46.5884270000000	299.053863000000
74.3120880000000	76.1792290000000	48.1391450000000	299.652636000000
75.1551400000000	76.7239610000000	46.2725060000000	300.722495000000
77.0689750000000	75.7578900000000	48.9726040000000	298.948959000000
74.4046780000000	74.9150710000000	48.8574440000000	300.419420000000
75.2275080000000	77.5943040000000	48.9810710000000	299.854085000000
75.7342840000000	76.1470840000000	47.3154690000000	299.689844000000
74.9163440000000	74.6659850000000	49.8125240000000	300.016686000000
76.7767780000000	73.2323330000000	49.9693040000000	299.704432000000
76.6988290000000	76.3054180000000	44.0872150000000	298.717022000000
76.7171850000000	76.1608730000000	47.8763550000000	298.980430000000
78.8920560000000	71.1668290000000	50.7667230000000	299.129263000000
77.9621530000000	72.2278930000000	49.7460430000000	299.173847000000
78.2059030000000	75.0340580000000	49.9178520000000	300.012916000000
78.0952020000000	76.5606160000000	49.2970620000000	299.137130000000
74.0054790000000	77.0192980000000	48.8479170000000	300.610378000000
75.1984150000000	76.5577860000000	48.8930920000000	299.313009000000
76.2645260000000	76.7430960000000	48.5174380000000	299.152538000000
75.0012820000000	77.4426780000000	43.2408290000000	300.501540000000
77.2734280000000	75.9628560000000	44.4008970000000	299.793765000000
75.0360110000000	74.7215860000000	47.3690670000000	300.716430000000
76.3423590000000	75.4095600000000	48.4476000000000	300.078481000000
78.0331370000000	75.1702240000000	48.6324010000000	298.921585000000
79.5557310000000	75.5293250000000	44.0909590000000	300.938860000000
76.4452620000000	76.0524490000000	47.1321630000000	299.283013000000
76.6212950000000	74.4682770000000	49.3595280000000	300.608248000000
76.0520230000000	76.2031350000000	49.1091280000000	302.548155000000
73.8313600000000	75.8817630000000	50.0471300000000	300.094873000000
69.5813940000000	77.5209060000000	50.1928250000000	299.018949000000
70.9188490000000	76.7569570000000	49.1411680000000	299.200073000000
72.0719990000000	74.6563720000000	48.1129890000000	300.389096000000
69.5478600000000	73.7984760000000	48.3416000000000	299.668863000000
71.6100030000000	76.6347870000000	50.0495550000000	300.066516000000
72.6626730000000	76.7679130000000	49.6649660000000	300.286159000000
74.6398820000000	75.4677730000000	50.2159070000000	300.220922000000
78.6442080000000	77.1795810000000	50.8115950000000	299.907029000000
77.3927560000000	75.3156430000000	48.0683340000000	299.749509000000
78.4298360000000	76.7737000000000	50.7064980000000	299.866050000000
78.7413130000000	76.4147910000000	49.0392310000000	299.520850000000
77.1523850000000	76.1774250000000	49.6125090000000	299.826548000000
76.3730300000000	76.6203690000000	47.4953560000000	299.833104000000
75.1530970000000	76.5071490000000	49.1023370000000	299.065009000000
75.0592510000000	75.4251680000000	47.3501460000000	302.064613000000
78.3372720000000	76.4697680000000	49.0173680000000	300.922960000000
75.7047310000000	75.9759870000000	49.7500120000000	298.536554000000
67.0938780000000	70.6391890000000	51.7380370000000	299.136147000000
68.1824990000000	73.8432050000000	46.6493260000000	300.107658000000
74.0516470000000	75.9714600000000	50.0040220000000	302.096084000000
71.2681460000000	76.1807610000000	44.1591460000000	299.587235000000
71.2240370000000	76.1270500000000	42.6856770000000	299.715579000000
74.8257600000000	75.4822870000000	47.5704170000000	299.977511000000
70.9669760000000	75.6265870000000	47.6175480000000	300.633490000000
76.1206070000000	76.4059760000000	50.4138260000000	299.668536000000
75.5835190000000	76.4065680000000	50.5482620000000	299.110249000000
79.2333170000000	77.1565700000000	43.3426270000000	301.080316000000
73.9999090000000	76.6262330000000	45.1945200000000	299.815893000000
73.0990810000000	74.9290620000000	49.4443650000000	299.804911000000
71.6116280000000	73.8108530000000	46.4563460000000	299.528554000000
74.2439640000000	73.8064440000000	48.9828580000000	299.820647000000
75.1722700000000	74.1547350000000	50.0716410000000	300.300911000000
76.7313710000000	76.2436420000000	47.2815870000000	298.872739000000
75.2157920000000	77.8873660000000	48.9853990000000	299.552485000000
76.1714490000000	76.4582180000000	48.0420960000000	299.204335000000
75.7635770000000	76.3149820000000	49.0985220000000	300.936893000000
74.0190830000000	75.4129680000000	49.2772120000000	300.451219000000
74.7573360000000	75.8765230000000	47.3417710000000	298.902571000000
74.9911700000000	75.5284890000000	28.9031880000000	300.030947000000
71.2714080000000	74.0152980000000	38.8551220000000	300.272062000000
71.7985010000000	75.3012540000000	44.6578530000000	300.044224000000
74.3114790000000	76.0597190000000	48.0994690000000	299.245641000000
75.1822750000000	74.8555680000000	48.8409410000000	300.876901000000
73.0191890000000	76.2165500000000	50.1447090000000	298.959613000000
75.8700000000000	77.3345360000000	45.3424680000000	298.435584000000
77.0983060000000	77.5987680000000	48.6106900000000	300.149620000000
77.0914090000000	75.3085780000000	51.4266290000000	299.372837000000
77.1209490000000	74.9857200000000	48.8243210000000	300.509736000000
75.4438680000000	76.3830430000000	48.9158240000000	300.383195000000
73.8203800000000	74.1102290000000	48.7465290000000	298.941910000000
73.6770270000000	75.8346730000000	44.7390190000000	299.932435000000
73.0013680000000	75.2521660000000	42.3380760000000	300.602511000000
75.3319410000000	76.1596630000000	40.9253840000000	299.535438000000
77.3737270000000	75.0234830000000	46.9179150000000	300.503671000000
72.9265870000000	76.7117370000000	50.6711770000000	299.889982000000
73.9855690000000	74.5569130000000	43.3754850000000	301.319629000000
72.3770250000000	76.8896940000000	45.1966870000000	299.193844000000
73.1527160000000	77.1302330000000	46.1362620000000	301.605985000000
77.8373910000000	76.0120900000000	47.0316150000000	299.750328000000
76.3308490000000	76.0082430000000	49.3804950000000	300.494656000000
76.7298380000000	76.2473010000000	48.0989310000000	302.582085000000
76.5724810000000	73.3193540000000	40.4811180000000	299.018130000000
75.8717780000000	73.6355560000000	43.4963270000000	300.457284000000
78.6214380000000	76.1367490000000	42.7258160000000	298.156932000000
74.5170070000000	76.6342820000000	45.6607320000000	301.257834000000
76.4356300000000	76.8519350000000	47.5158430000000	297.942370000000
75.9710360000000	73.3909370000000	48.9489070000000	299.702302000000
75.0978340000000	71.3192190000000	49.9827070000000	300.723478000000
75.9639770000000	75.6384360000000	49.7831050000000	299.121231000000
76.9568950000000	76.6010590000000	48.6115260000000	299.698532000000
79.1709550000000	76.6584570000000	50.0871910000000	299.905226000000
77.3301540000000	76.1401060000000	48.8909280000000	299.982592000000
74.2434860000000	73.0690230000000	49.5650670000000	299.654767000000
76.7338830000000	74.3237920000000	43.7213270000000	299.586579000000
73.2984580000000	76.9843170000000	44.4461580000000	300.062582000000
73.4050750000000	78.0709150000000	46.2038750000000	299.341202000000
73.7099220000000	76.3508470000000	49.1227620000000	300.823465000000
78.0279680000000	75.3971380000000	51.2468640000000	301.056549000000
75.3845320000000	76.8018490000000	49.8888570000000	300.747082000000
75.0803200000000	76.9684210000000	49.9736300000000	297.706991000000
75.2232050000000	77.2172370000000	50.9938800000000	299.553797000000
72.6126960000000	75.6221520000000	50.8943370000000	299.429715000000
75.0764500000000	74.9050960000000	50.1700160000000	300.252721000000
75.9124210000000	75.4455010000000	49.9252800000000	300.927058000000
75.0882380000000	76.0909450000000	44.7264020000000	300.274193000000
76.6903360000000	76.5052790000000	43.0092630000000	301.143259000000
74.3840910000000	75.5381100000000	45.2614160000000	301.243901000000
70.0301910000000	71.3942940000000	48.0714470000000	299.487904000000
76.0688870000000	72.1852470000000	46.1083020000000	301.014915000000
75.4481960000000	76.1728530000000	46.9438800000000	299.430534000000
74.4998570000000	76.2650110000000	46.5768010000000	298.427552000000
74.1187510000000	76.7770730000000	46.2177270000000	299.143195000000
72.5376950000000	76.3410600000000	45.7663700000000	300.679058000000
77.2820610000000	76.3836680000000	51.3165310000000	299.835235000000
77.3525190000000	76.3298790000000	53.9296580000000	297.932863000000
73.5173270000000	77.0472790000000	51.0542200000000	301.650405000000
76.1631740000000	76.6733320000000	50.8945500000000	300.029635000000
77.8753150000000	76.8209710000000	49.9739490000000	299.911126000000
76.3368300000000	76.6944640000000	50.9159270000000	301.030815000000
76.1561690000000	74.4688010000000	49.8369630000000	299.941614000000
71.0401360000000	73.2591840000000	48.5927140000000	300.814286000000
72.0105470000000	76.2041880000000	49.7393390000000	298.617035000000
78.0266780000000	75.3749470000000	47.1034190000000	299.542487000000
78.0923110000000	75.4951460000000	47.9033250000000	301.099986000000
72.6790340000000	76.7712120000000	50.0795920000000	299.928173000000
72.8878310000000	77.1876880000000	50.4862730000000	300.529569000000
76.8563180000000	75.2297400000000	49.9281670000000	299.605757000000
78.9032430000000	76.7472880000000	48.5688490000000	299.017146000000
77.4455750000000	76.5564620000000	46.7902800000000	298.824713000000
72.4718640000000	77.0093210000000	46.9828160000000	301.059008000000
75.3201440000000	76.7824660000000	46.5938420000000	298.964694000000
77.0442460000000	77.6698660000000	43.9736880000000	300.575957000000
72.3211220000000	77.1534580000000	46.6351620000000	300.036684000000
70.0768970000000	76.2470540000000	44.2200070000000	301.210955000000
75.1140010000000	73.4120220000000	45.4340360000000	299.213350000000
76.4137860000000	76.0355490000000	41.9543230000000	323.033810000000
75.9981060000000	77.4365450000000	47.9174180000000	323.476538000000
78.7507600000000	79.2735690000000	49.8804860000000	324.292168000000
78.7476100000000	78.8098800000000	49.4220640000000	325.471029000000
79.7240530000000	79.1549030000000	51.0426740000000	325.006008000000
81.2423380000000	79.8671500000000	52.9101170000000	324.587703000000
78.0306800000000	81.2692930000000	52.9904500000000	323.394418000000
78.2915290000000	80.1356570000000	46.7582880000000	324.970439000000
80.6478320000000	78.7750090000000	49.8812500000000	325.318918000000
80.8009510000000	79.6759000000000	49.6308770000000	324.743092000000
77.9260590000000	80.2502690000000	50.9813630000000	324.481323000000
79.7995980000000	78.9210390000000	51.5937540000000	324.427888000000
77.6713690000000	77.8517960000000	44.2772310000000	325.437263000000
78.8662570000000	79.2226070000000	44.0437500000000	324.134812000000
75.6801170000000	80.3674830000000	49.3134680000000	325.902939000000
78.9902610000000	78.1791290000000	48.2765050000000	323.804200000000
77.3110280000000	79.1411630000000	47.8957590000000	324.021384000000
78.7760710000000	80.0696180000000	43.2785530000000	324.553117000000
78.8649380000000	79.0848110000000	45.4954550000000	326.873466000000
81.0280790000000	80.4213770000000	49.9680210000000	325.027809000000
80.5431240000000	76.8210330000000	51.0691230000000	325.656414000000
79.2066740000000	78.3030860000000	53.8202040000000	323.457032000000
66.1592940000000	80.4657450000000	53.6140960000000	324.421167000000
80.9579550000000	78.4823480000000	52.8719960000000	324.079409000000
81.9011410000000	79.0498660000000	53.3887340000000	325.438082000000
78.5590750000000	75.6910600000000	53.8366940000000	326.249942000000
69.1789720000000	77.2165240000000	54.9494900000000	324.865699000000
72.5777490000000	79.1539190000000	53.6143970000000	324.914381000000
83.1050570000000	80.0138280000000	56.1384280000000	325.663626000000
81.7665070000000	79.9115050000000	53.2533760000000	325.020760000000
78.9253170000000	79.8148920000000	52.4621050000000	325.493485000000
78.6779930000000	78.9436530000000	51.7224650000000	325.278759000000
78.6059210000000	80.1492050000000	50.2003040000000	324.748665000000
77.4190190000000	80.2512910000000	53.2308930000000	324.550658000000
79.4747330000000	80.7068350000000	52.4852960000000	324.553445000000
79.6363320000000	79.4524650000000	52.1970570000000	325.348094000000
80.4643150000000	79.1750790000000	51.5885950000000	324.252829000000
78.8675470000000	79.9936260000000	54.3065430000000	324.594751000000
82.1319120000000	80.9681180000000	54.1230370000000	324.810788000000
79.9349210000000	81.0596150000000	53.0422520000000	325.195983000000
76.8381180000000	78.5674780000000	54.1072570000000	325.582817000000
79.6277410000000	79.5043830000000	51.0271700000000	324.025810000000
81.4077550000000	78.6299530000000	53.7576780000000	326.140612000000
82.5438060000000	80.5693200000000	51.8018050000000	325.391203000000
83.4658100000000	82.2009410000000	52.8292430000000	324.899137000000
81.0486170000000	81.4504930000000	53.0321290000000	324.687034000000
79.3371610000000	77.9796040000000	54.6699390000000	324.979782000000
80.7787010000000	78.9501120000000	51.7429110000000	324.545249000000
81.3837780000000	80.1175410000000	51.7629710000000	324.682936000000
81.7043870000000	76.3920720000000	52.4758840000000	325.874418000000
80.6110340000000	78.5919370000000	51.9244520000000	324.739650000000
79.6445190000000	80.2537940000000	53.4573990000000	325.617895000000
79.9780870000000	81.5164080000000	49.7084320000000	324.761614000000
78.7080660000000	80.6192950000000	52.1944530000000	326.419592000000
79.0159460000000	76.8232150000000	48.4710290000000	325.081900000000
77.5958820000000	77.9313150000000	51.6015950000000	324.994534000000
77.4428410000000	79.0932380000000	49.7075640000000	325.764269000000
83.2481290000000	79.2595730000000	52.6152990000000	324.278727000000
81.2420750000000	79.3714470000000	51.6168990000000	325.523481000000
79.9761750000000	77.3555090000000	49.9251240000000	326.045707000000
79.7817320000000	79.0726780000000	51.9583830000000	325.869828000000
81.3053520000000	77.6629810000000	49.5154010000000	325.303182000000
79.6537150000000	80.2944310000000	50.3812330000000	324.171200000000
80.4699780000000	79.5497290000000	51.6929470000000	324.857503000000
77.2227850000000	79.1480910000000	49.7025450000000	325.030923000000
74.4692180000000	78.7637920000000	48.0741040000000	324.558198000000
80.2140670000000	76.0161940000000	50.5137970000000	325.232700000000
80.5044930000000	75.9629950000000	51.6238690000000	323.298693000000
80.9508850000000	79.0473000000000	45.5570400000000	324.727848000000
80.7336670000000	80.9797570000000	45.2619950000000	324.928477000000
80.0288440000000	81.5574240000000	45.6016770000000	325.485781000000
80.9078280000000	80.5052630000000	50.4347170000000	326.064065000000
77.1937050000000	79.4372070000000	51.6092660000000	325.611830000000
81.2288280000000	75.2534890000000	48.9943660000000	323.905990000000
78.6045590000000	76.3761750000000	48.9476320000000	324.947819000000
78.2616660000000	79.1634250000000	51.3285210000000	324.888319000000
82.4481420000000	76.1940670000000	52.6134940000000	324.821934000000
79.6032420000000	76.0142360000000	43.2950530000000	325.917363000000
77.7165470000000	78.7925200000000	44.6280100000000	324.230373000000
82.0287000000000	78.9304140000000	49.0511490000000	324.957654000000
81.2712640000000	80.2449860000000	51.5253440000000	323.679462000000
80.0272200000000	79.6555290000000	50.2362170000000	324.882582000000
78.6401860000000	80.2346310000000	49.3218990000000	325.769350000000
77.9757990000000	80.3120430000000	50.8561310000000	325.809181000000
79.7798700000000	80.3642480000000	53.0968170000000	325.188279000000
77.4759130000000	79.2491500000000	51.1090190000000	324.458539000000
78.0342770000000	80.4925960000000	52.4271620000000	324.192017000000
73.7093960000000	80.3427620000000	49.6329670000000	324.686542000000
78.4316060000000	79.4582000000000	52.7965030000000	326.101109000000
78.7434350000000	80.9455880000000	52.3728140000000	324.696377000000
79.3686720000000	80.8067290000000	51.0435550000000	325.388089000000
78.4298610000000	80.7703400000000	52.1640000000000	325.348094000000
79.9149900000000	81.7394630000000	50.2094860000000	325.787216000000
79.6858330000000	80.1950500000000	45.1365970000000	324.826196000000
78.1291110000000	78.1526890000000	48.3849760000000	324.814394000000
79.7368540000000	79.3264790000000	49.4808230000000	324.543446000000
80.9427520000000	79.8541770000000	51.0338430000000	324.632943000000
81.1059650000000	80.2292930000000	54.2602230000000	325.532332000000
79.3125150000000	80.8835570000000	50.4097130000000	325.203031000000
77.1933560000000	81.4007970000000	49.3147000000000	325.266302000000
72.7785680000000	77.1256350000000	46.8508550000000	324.768171000000
83.7225770000000	79.9596680000000	48.1495040000000	325.443983000000
82.4583260000000	81.3244810000000	49.6044080000000	323.735684000000
78.5940790000000	80.9049980000000	49.9608490000000	325.170413000000
83.3652660000000	78.4450980000000	48.3175350000000	325.117797000000
80.3651170000000	79.6337150000000	52.1696780000000	326.048002000000
81.6283600000000	80.8075640000000	52.2063430000000	325.128451000000
77.7451170000000	81.3410910000000	51.8631190000000	324.508369000000
82.3079340000000	80.5562880000000	51.3805430000000	324.706540000000
76.9167430000000	80.2337720000000	43.7323890000000	324.553773000000
75.2983100000000	79.7219420000000	46.9470780000000	325.456604000000
79.9154680000000	79.4076640000000	52.9282420000000	325.274169000000
79.5526840000000	78.7354710000000	53.6723990000000	324.094653000000
79.7969210000000	79.3887720000000	54.3265820000000	324.845701000000
75.6482980000000	79.6298170000000	51.0837920000000	324.380681000000
78.7775340000000	80.6418360000000	48.9799470000000	325.372189000000
77.1846530000000	80.5977470000000	51.0881360000000	324.855864000000
80.6855860000000	80.7518200000000	52.2554130000000	324.584424000000
81.3755660000000	80.9368220000000	49.1553200000000	324.776039000000
81.4327570000000	81.9796930000000	47.0232860000000	325.650185000000
81.2168300000000	80.9881790000000	49.1060850000000	325.203687000000
74.6694920000000	81.2958290000000	51.8629530000000	324.563935000000
78.6133950000000	80.1333510000000	48.1554840000000	324.668512000000
81.6669540000000	81.7113040000000	49.1697830000000	323.350981000000
77.1531480000000	80.6458400000000	51.0130240000000	324.898481000000
77.4447620000000	79.8718360000000	53.2739970000000	326.355666000000
80.0459840000000	77.0612280000000	48.0854290000000	324.644253000000
81.2999230000000	79.3274910000000	43.7828300000000	326.198965000000
81.4312650000000	80.2228400000000	48.3072270000000	324.170709000000
76.9517240000000	79.9317140000000	49.1242580000000	325.224668000000
78.7498550000000	79.7572780000000	52.3970770000000	326.968372000000
74.9275850000000	76.4669830000000	53.4000000000000	324.423790000000
74.1393470000000	78.8316670000000	53.2151500000000	325.393990000000
80.5096790000000	76.2456190000000	52.7191510000000	325.075835000000
76.7600400000000	79.9552250000000	52.5822010000000	324.866027000000
76.7861070000000	80.1564570000000	52.1267470000000	325.201228000000
80.1934120000000	78.7072560000000	50.8658000000000	325.901628000000
79.9797270000000	80.2466100000000	51.9381360000000	324.166775000000
81.2699670000000	76.8628330000000	49.4921690000000	323.790267000000
82.0091960000000	75.7610780000000	50.1267270000000	324.388713000000
81.3403450000000	77.4950530000000	51.6719090000000	324.821770000000
79.4368760000000	79.5854340000000	52.3843730000000	325.163692000000
78.1567370000000	79.6754980000000	51.6665040000000	324.512467000000
79.2553860000000	78.8824410000000	53.2589400000000	324.754566000000
80.7551800000000	78.2951710000000	54.5920110000000	325.585604000000
81.1114060000000	78.2342760000000	51.9893130000000	325.770006000000
79.2422420000000	78.0136020000000	53.5173260000000	324.756369000000
78.7963160000000	79.0464670000000	55.0885500000000	325.546756000000
78.6518510000000	80.6041220000000	52.8087180000000	324.514925000000
80.8933310000000	80.7531230000000	51.5244350000000	324.694574000000
78.8827020000000	77.2175540000000	50.9423060000000	325.377598000000
78.0809870000000	77.9675560000000	49.3117620000000	325.616091000000
81.4939490000000	80.4653810000000	49.8497700000000	324.468702000000
79.2314750000000	81.3185790000000	53.1039100000000	324.449524000000
79.6515570000000	79.0450950000000	54.0245630000000	325.031415000000
82.1106060000000	77.4709890000000	54.2858430000000	323.836163000000
82.9115100000000	79.3900170000000	51.6860490000000	324.864715000000
80.2618580000000	79.6651940000000	53.2937300000000	324.343801000000
80.8458660000000	80.0250180000000	52.2645000000000	325.434312000000
79.8180300000000	80.0787390000000	50.1222830000000	325.065672000000
78.3002130000000	80.1290680000000	51.3460270000000	325.597078000000
81.4550100000000	80.2264780000000	52.5279040000000	343.804345000000
82.4639070000000	82.4187750000000	50.7870340000000	347.717270000000
82.4675280000000	83.3721190000000	50.3563420000000	349.306569000000
84.8218930000000	83.4248540000000	53.5042560000000	350.815386000000
84.4110890000000	84.1534600000000	53.1195880000000	350.078598000000
77.2826790000000	83.9691930000000	50.4045050000000	349.155769000000
79.4912900000000	85.3358210000000	53.3363560000000	349.205598000000
81.5262890000000	84.3167010000000	50.2425520000000	350.191534000000
84.2718690000000	84.5167930000000	52.6496560000000	349.937141000000
80.7556470000000	83.4799700000000	51.4667240000000	350.448549000000
82.5900520000000	83.1384990000000	53.5786770000000	349.461138000000
83.2016460000000	83.6460030000000	55.9871760000000	350.101382000000
77.3948120000000	83.9813250000000	58.1556880000000	348.769590000000
85.0422360000000	83.9261810000000	56.4874110000000	349.189699000000
86.0051590000000	84.5504130000000	52.0320730000000	350.078925000000
86.9071780000000	80.8856420000000	50.5654980000000	350.635573000000
87.0306370000000	82.5038120000000	51.7027260000000	349.861085000000
83.7494350000000	83.7992650000000	51.6835260000000	350.215957000000
83.9034410000000	85.0430000000000	54.2768920000000	349.500641000000
86.2739940000000	81.9308240000000	52.8794660000000	349.631771000000
84.8341840000000	84.2717050000000	56.1805650000000	350.286931000000
84.5932240000000	85.4311400000000	55.4613370000000	350.135311000000
84.3931980000000	84.8597990000000	55.5650070000000	349.147737000000
85.6729030000000	84.9390570000000	53.7399660000000	349.879444000000
84.8399930000000	83.3877650000000	54.8107460000000	350.344792000000
84.8854310000000	80.1336480000000	54.9321530000000	350.719824000000
82.3166350000000	79.1273740000000	54.9738960000000	349.962220000000
81.5427400000000	83.4691080000000	56.1376550000000	349.960089000000
83.6651930000000	85.2649550000000	55.9628330000000	350.275457000000
83.9778860000000	84.9871000000000	54.4776030000000	352.434680000000
85.7194510000000	85.0102470000000	49.6034020000000	349.208876000000
82.2473430000000	84.0660840000000	48.1604880000000	350.092366000000
80.8684720000000	83.5754150000000	53.3105160000000	350.563943000000
86.3137220000000	82.8323440000000	54.5474100000000	350.278571000000
83.5581600000000	84.2421010000000	53.4151810000000	350.093022000000
85.1075240000000	83.3122280000000	53.1105780000000	348.845154000000
78.7413190000000	84.5735120000000	54.1456990000000	349.282309000000
83.7539690000000	83.5850870000000	55.1756010000000	351.305485000000
82.6975450000000	85.3454140000000	55.2735570000000	349.820107000000
85.9968000000000	84.4050330000000	54.3323110000000	349.273950000000
81.9771110000000	84.7292900000000	54.6974940000000	349.762082000000
82.5447500000000	83.5006640000000	56.1874750000000	350.678355000000
83.8313160000000	84.4928100000000	52.5042690000000	350.155637000000
81.7721880000000	82.9571500000000	47.5690020000000	349.565387000000
84.1344810000000	81.0378170000000	55.0590050000000	349.703074000000
85.6016900000000	81.0518670000000	57.6350550000000	349.751592000000
83.2099870000000	82.9737620000000	52.7264130000000	350.511491000000
81.8703680000000	82.6061490000000	56.6757710000000	351.293191000000
76.7890800000000	83.1403480000000	58.0880190000000	349.738643000000
77.4506790000000	83.2553000000000	56.8755070000000	350.832760000000
80.8418640000000	83.4266600000000	54.1739740000000	349.508837000000
83.0905930000000	83.2566810000000	53.1322550000000	349.396721000000
82.6579310000000	83.2568100000000	54.1632680000000	350.641966000000
84.8159840000000	83.7514850000000	52.2799500000000	349.637344000000
85.5904520000000	83.9253980000000	54.7710830000000	349.350661000000
83.6732670000000	83.6010480000000	54.0804570000000	350.864395000000
85.5465260000000	83.4099120000000	53.4688080000000	349.970251000000
84.4678550000000	84.2468820000000	52.0491400000000	350.868165000000
84.8609810000000	84.2510910000000	52.2147220000000	349.385902000000
81.4780550000000	84.3436660000000	54.8559820000000	350.229070000000
83.6723920000000	84.1324040000000	56.7663230000000	349.714711000000
85.9602340000000	83.7194380000000	59.9671670000000	349.872231000000
84.0566060000000	83.6346270000000	57.5977900000000	350.507066000000
85.9976550000000	83.3270140000000	54.7253220000000	349.224776000000
85.8338130000000	84.1264050000000	56.8338500000000	350.600004000000
84.8325870000000	84.6764810000000	55.4660890000000	350.227103000000
82.2816720000000	85.6995210000000	52.0184460000000	350.299060000000
81.3515410000000	83.7071980000000	55.1477370000000	349.140525000000
81.3399170000000	83.4642680000000	52.9628740000000	349.388361000000
83.1002400000000	84.8569390000000	51.6154840000000	350.449532000000
85.9328640000000	85.3815150000000	52.6335460000000	349.398032000000
88.3517480000000	84.7319170000000	48.2445700000000	349.530146000000
81.0148310000000	83.5375350000000	52.4245450000000	349.981070000000
81.3642270000000	80.5345970000000	55.2459200000000	349.364266000000
83.6962020000000	81.7245580000000	58.1276430000000	350.498542000000
79.0632400000000	76.8887430000000	58.3697840000000	350.104332000000
80.4564180000000	80.0133310000000	56.0701510000000	350.093350000000
83.6760540000000	82.4826500000000	54.9096250000000	351.125345000000
85.0530540000000	84.5271790000000	55.1496800000000	349.690780000000
85.6762870000000	80.5650310000000	53.5494540000000	349.219695000000
82.1404230000000	83.3783180000000	50.6223520000000	350.662947000000
83.6953510000000	82.4568360000000	53.2504370000000	350.243494000000
86.5896690000000	83.7988210000000	50.9899830000000	349.339023000000
85.2674430000000	85.2027140000000	52.3485050000000	350.811288000000
83.2849180000000	84.5589330000000	52.7311880000000	350.116298000000
86.8808220000000	82.5241150000000	53.0622560000000	349.736348000000
79.7920360000000	82.2864620000000	53.5806800000000	349.721596000000
81.5461380000000	84.9913150000000	53.9292000000000	351.876557000000
77.7192250000000	84.0137340000000	57.4958270000000	349.671766000000
82.9073540000000	84.2665070000000	55.1747790000000	348.772049000000
81.8513690000000	84.4322900000000	53.8057080000000	349.786013000000
83.3805640000000	82.6748830000000	54.3246140000000	350.616068000000
82.9920110000000	84.1584150000000	55.8558370000000	349.328369000000
86.6969060000000	85.3789710000000	44.6133810000000	350.313976000000
85.5346390000000	84.1662580000000	49.1016400000000	350.787520000000
83.0278740000000	84.6741370000000	51.8594440000000	349.546373000000
84.9231090000000	85.5235960000000	55.7996990000000	349.490806000000
85.1073520000000	84.5727140000000	55.5348900000000	349.878296000000
85.2762530000000	85.8063570000000	55.5506230000000	349.252149000000
82.1291800000000	85.6279440000000	56.5081480000000	349.732086000000
82.3217140000000	84.0362130000000	57.5509470000000	350.544766000000
77.8901660000000	83.8251420000000	56.9540870000000	349.573910000000
85.7426680000000	82.6265330000000	55.3695040000000	350.176781000000
84.4502130000000	83.7694080000000	54.7151790000000	350.684255000000
86.4226860000000	83.2050980000000	54.4444340000000	349.339515000000
83.5179510000000	84.3440430000000	53.7944280000000	349.461958000000
85.7131650000000	83.4759800000000	53.2482580000000	350.937665000000
85.5406840000000	83.6754620000000	54.8998790000000	349.992216000000
85.0593200000000	79.4201440000000	53.4757270000000	349.795356000000
83.3804550000000	82.2086720000000	53.6937520000000	349.383116000000
81.9379310000000	81.5856850000000	56.7575970000000	349.948943000000
81.0947680000000	83.5478280000000	55.0435200000000	350.421339000000
80.4213770000000	83.2178100000000	54.6706180000000	350.020081000000
84.3309510000000	81.6126750000000	52.9042420000000	349.752247000000
83.4021140000000	84.3230720000000	55.7088100000000	350.007787000000
85.1626650000000	84.7390640000000	55.4991640000000	350.734740000000
87.3600750000000	82.5203200000000	54.3509470000000	349.752083000000
80.6485860000000	84.6436210000000	56.3250630000000	351.007000000000
84.4115540000000	83.4506090000000	56.5900350000000	349.432454000000
81.6160960000000	83.5445940000000	57.2194750000000	349.798799000000
84.2129890000000	80.6732750000000	54.1615850000000	350.995362000000
81.9458480000000	82.8808550000000	54.2873750000000	349.449009000000
83.8761020000000	84.8404000000000	54.4185560000000	350.166783000000
81.1627840000000	84.4091210000000	54.1351960000000	350.513622000000
79.4790420000000	84.8038160000000	56.1093660000000	348.872200000000
84.9101560000000	83.1207550000000	51.3692420000000	349.510476000000
84.9751470000000	85.2501660000000	55.3322900000000	350.282341000000
86.4721920000000	82.5985150000000	56.1824390000000	349.831089000000
84.9625960000000	82.9918320000000	55.5828010000000	349.006936000000
83.8801660000000	84.0384740000000	55.7670060000000	350.845382000000
83.1835330000000	82.4149100000000	55.9888000000000	349.381313000000
82.4296990000000	83.5698390000000	55.5157080000000	350.472152000000
84.2869380000000	83.9693650000000	54.2133680000000	349.959761000000
82.8519720000000	82.6998740000000	53.2138740000000	350.543126000000
81.8039410000000	83.6901990000000	53.4387020000000	350.496083000000
86.8058090000000	82.7792710000000	53.8764880000000	349.315092000000
82.5665870000000	82.5706960000000	53.7626250000000	349.877641000000
79.3767490000000	81.7474680000000	55.9943390000000	349.436715000000
82.0892790000000	83.0654670000000	47.0092690000000	350.305125000000
81.1165070000000	82.8059940000000	50.0575670000000	350.055158000000
82.9759980000000	81.9755950000000	52.9978320000000	349.838138000000
81.4004970000000	83.7416410000000	55.6834260000000	350.181043000000
81.5284670000000	85.4878730000000	57.8669960000000	350.412816000000
86.9531960000000	84.4870360000000	58.9279090000000	350.279063000000
87.1675680000000	85.3751170000000	60.1808520000000	349.293783000000
84.6573240000000	85.3204070000000	59.7152740000000	351.107314000000
84.5969890000000	84.9354180000000	58.6047080000000	349.905834000000
81.4565430000000	84.0801750000000	58.5837990000000	349.417374000000
81.9263870000000	84.1619600000000	56.9611070000000	352.060631000000
83.8917330000000	79.4278210000000	55.7775670000000	348.893344000000
85.5993100000000	82.6519730000000	56.1465830000000	349.556535000000
80.9611920000000	83.4551670000000	57.6040360000000	350.088269000000
82.1407910000000	83.9738210000000	52.4325900000000	349.058568000000
82.8534060000000	84.0693570000000	55.1807460000000	351.300567000000
84.4329180000000	83.3734560000000	55.3512890000000	351.163536000000
85.1561540000000	83.9125110000000	55.6784730000000	351.101086000000
83.2701950000000	84.0413690000000	58.0262530000000	350.099087000000
84.3935850000000	84.5531590000000	59.1603740000000	348.837122000000
83.1103940000000	84.2001620000000	58.3358880000000	350.894555000000
81.9450230000000	84.7808160000000	57.4774280000000	351.362526000000
84.5628210000000	84.5894930000000	58.1126770000000	349.654227000000
85.5082760000000	84.2683550000000	54.2529910000000	373.683676000000
84.7520690000000	86.2179270000000	55.8711840000000	373.682857000000
88.9657970000000	85.9464090000000	57.7509280000000	374.780744000000
82.2948700000000	86.3167100000000	51.5496990000000	375.688329000000
84.4850220000000	87.9052600000000	55.9103520000000	374.541104000000
86.9604480000000	87.1085080000000	56.5176170000000	375.529334000000
85.2332490000000	87.2452330000000	54.1685720000000	373.977736000000
86.6284490000000	87.4833750000000	55.7081650000000	374.967113000000
86.7669800000000	86.3487560000000	54.7568960000000	374.492094000000
86.8819980000000	86.1638400000000	59.0074700000000	373.687282000000
84.8805450000000	87.4359080000000	55.1299510000000	374.445871000000
87.3154180000000	88.1784510000000	56.3423620000000	374.911875000000
88.3249990000000	88.9319340000000	55.6153390000000	374.607161000000
88.4917520000000	84.4878460000000	54.4144500000000	375.635058000000
88.1362420000000	86.9430940000000	50.3651510000000	377.050117000000
86.0514110000000	88.0522690000000	51.8682730000000	374.447837000000
84.4276080000000	88.1055970000000	54.9219890000000	375.010386000000
81.2030650000000	87.8518180000000	55.2162050000000	375.109226000000
80.5869270000000	87.3278950000000	55.8194060000000	375.326082000000
89.1765690000000	86.2046060000000	56.7086030000000	375.040054000000
86.8718070000000	86.6737670000000	54.2594090000000	374.525204000000
88.5542050000000	86.0890800000000	57.8690550000000	375.701934000000
86.8224560000000	87.5124670000000	60.0271210000000	375.814542000000
86.0537700000000	87.0223610000000	57.2481050000000	373.916432000000
87.2998110000000	88.0788510000000	59.5166120000000	375.860929000000
88.7258270000000	87.4441600000000	61.3436840000000	375.055954000000
85.9791170000000	85.6078150000000	58.8241260000000	374.477178000000
86.4085670000000	84.4542240000000	56.8934360000000	375.207409000000
89.3050340000000	80.5282620000000	56.0875860000000	374.191642000000
90.1433400000000	83.3120460000000	59.3240370000000	375.467375000000
86.5489830000000	86.0846900000000	58.6987260000000	376.775891000000
86.6532250000000	87.0608970000000	60.0593090000000	374.236554000000
87.9944990000000	87.5287200000000	59.1637670000000	375.097752000000
86.8045540000000	85.7292220000000	59.3168200000000	374.660432000000
88.7020880000000	84.1370540000000	57.6803330000000	375.486225000000
87.6201600000000	86.2670550000000	55.4845920000000	375.238225000000
87.7963040000000	87.7275110000000	56.6310400000000	375.005960000000
85.9915000000000	85.7967010000000	58.7007340000000	375.076935000000
90.5826960000000	87.6586990000000	57.1202780000000	375.416562000000
87.9202050000000	88.2345010000000	57.4791620000000	375.634894000000
88.3465890000000	85.6117800000000	57.7829360000000	375.335917000000
88.7569860000000	89.1318500000000	59.0583650000000	373.507142000000
87.0781850000000	88.1799370000000	59.4395330000000	374.604538000000
83.8853630000000	84.9499960000000	57.9676880000000	374.324903000000
86.0188390000000	85.9531720000000	56.8366560000000	375.290513000000
90.0289080000000	87.5536240000000	55.8584660000000	375.724882000000
86.8294850000000	87.9230500000000	54.8267340000000	374.411285000000
82.3514100000000	88.2155990000000	56.1607960000000	375.351816000000
89.1180710000000	88.7696620000000	53.0279320000000	374.659449000000
88.0956200000000	88.4009080000000	53.8814230000000	373.878404000000
87.6470990000000	82.3372410000000	57.0413740000000	374.023959000000
87.8089010000000	85.2657560000000	56.3585050000000	375.213638000000
87.0941450000000	87.3248070000000	49.7608060000000	374.551266000000
87.3390920000000	88.5343320000000	52.9310650000000	375.766680000000
91.3178040000000	88.2322230000000	57.6556440000000	375.489995000000
90.2891110000000	87.7724240000000	60.4488280000000	374.157876000000
89.7798290000000	87.6171730000000	59.0580810000000	374.793857000000
82.7728670000000	88.9119970000000	58.4293140000000	375.197411000000
86.4046550000000	89.8154910000000	56.6456110000000	374.996290000000
88.0971490000000	88.7132470000000	59.2234330000000	375.067919000000
90.5124410000000	89.4686770000000	58.6074970000000	375.049561000000
88.4473410000000	88.6946830000000	55.0261050000000	374.601260000000
87.1844290000000	87.4927800000000	58.7396380000000	375.774384000000
80.9746440000000	85.6516080000000	59.4736590000000	375.764385000000
77.2715510000000	85.0530200000000	57.8840830000000	374.645516000000
81.5722120000000	87.0699670000000	55.3171480000000	374.722883000000
87.1779170000000	88.6972430000000	56.6581860000000	375.457048000000
87.2497490000000	88.2095530000000	60.3235630000000	374.720588000000
85.3307510000000	88.0250040000000	58.5804670000000	373.582706000000
87.6699060000000	87.2286210000000	56.7604700000000	374.009371000000
89.1640800000000	87.4569170000000	54.3995900000000	376.005501000000
89.1639920000000	87.9016320000000	58.8801700000000	375.034809000000
85.2259040000000	87.2017680000000	56.3005780000000	374.462754000000
83.2811780000000	87.6994360000000	56.2810200000000	374.680266000000
83.5608380000000	88.6680240000000	56.5647550000000	374.780744000000
86.9493070000000	88.0718930000000	58.3462690000000	374.709606000000
89.3328410000000	86.4239890000000	60.7816420000000	374.138206000000
88.8070010000000	88.1329070000000	60.4316020000000	375.319853000000
88.6542380000000	88.2777240000000	58.7591400000000	374.702886000000
88.8117470000000	88.4202440000000	57.3794190000000	375.038579000000
89.2837150000000	88.9338590000000	59.0103520000000	374.531761000000
88.6451700000000	87.8076060000000	58.2082030000000	374.989405000000
87.4798780000000	88.9329290000000	54.0048710000000	375.379518000000
86.1026350000000	88.3197050000000	52.8962440000000	375.633091000000
85.8029300000000	87.4735850000000	56.0781060000000	374.552578000000
87.7237920000000	86.9303360000000	58.2485410000000	374.549299000000
87.2577110000000	89.0182710000000	56.2821530000000	374.170005000000
86.8667510000000	88.7900040000000	56.5641160000000	375.879452000000
87.9260980000000	88.9346900000000	58.5743120000000	375.488847000000
88.5142160000000	87.6342630000000	55.6491740000000	374.716818000000
82.9916730000000	87.1643460000000	54.1330000000000	375.023991000000
87.2270350000000	88.0231690000000	55.7466940000000	374.902040000000
88.4010850000000	89.1972430000000	56.1756410000000	375.115454000000
88.2585360000000	87.6581570000000	59.1140380000000	373.823658000000
85.2367500000000	87.8866510000000	55.1193130000000	375.517204000000
90.1484620000000	88.2306690000000	56.6654150000000	375.067919000000
88.9966540000000	86.7254300000000	53.6695570000000	374.631256000000
80.6563570000000	87.7658390000000	52.7101440000000	374.612242000000
86.2118180000000	87.8674660000000	56.8060670000000	375.113651000000
88.2384240000000	84.7277450000000	58.6316570000000	374.734357000000
88.7011770000000	85.0554250000000	53.5058330000000	375.788480000000
88.9869230000000	85.8325840000000	56.0063090000000	373.637125000000
85.0603850000000	84.7752660000000	58.3205670000000	375.184461000000
85.3390110000000	86.2532760000000	55.3524950000000	375.833228000000
89.0979440000000	84.9514650000000	56.4371450000000	375.322968000000
88.2384280000000	86.9693940000000	53.0450440000000	374.767795000000
80.0777500000000	86.7095610000000	56.1135010000000	375.829458000000
88.9572530000000	88.4243770000000	59.8810250000000	375.245765000000
87.6536560000000	89.1029600000000	57.0543970000000	374.653220000000
87.7780990000000	87.4124230000000	57.1554780000000	375.573099000000
87.3424540000000	88.7724870000000	60.0001330000000	375.509501000000
82.4188640000000	87.7268510000000	58.2307650000000	373.698100000000
80.0002840000000	87.2962460000000	59.0223020000000	373.600081000000
83.8794820000000	84.3381850000000	56.1919530000000	374.907121000000
86.7223240000000	86.7443700000000	54.5541980000000	374.346212000000
85.7159670000000	86.3652610000000	56.7419730000000	375.541955000000
87.8782050000000	86.4240450000000	56.5490280000000	375.241011000000
86.6969070000000	86.1915130000000	56.2754740000000	374.755174000000
89.9701730000000	88.0263790000000	54.1573290000000	375.641614000000
88.2663830000000	87.7965710000000	53.4239280000000	375.730783000000
84.8209030000000	87.9381910000000	52.6985110000000	374.617487000000
83.8351680000000	88.4482510000000	56.0523060000000	375.163153000000
86.2578190000000	87.2212180000000	57.9473510000000	375.007108000000
88.2245850000000	87.7486870000000	58.3842810000000	375.509664000000
89.7477830000000	88.2887820000000	57.0073410000000	374.151975000000
90.0894170000000	89.6393900000000	57.6665520000000	375.064805000000
91.4924740000000	88.8459130000000	59.4351310000000	375.329360000000
90.5283120000000	88.6693670000000	58.1031070000000	374.040186000000
85.0619180000000	84.5156540000000	57.0911050000000	374.986127000000
84.4597470000000	82.7680220000000	52.7990260000000	374.028876000000
86.1535490000000	85.0040510000000	57.1919980000000	375.421807000000
88.7446780000000	85.7810080000000	57.7418030000000	374.519140000000
86.2239550000000	87.2495170000000	58.3159920000000	375.032514000000
80.3205720000000	88.1122290000000	52.8362890000000	375.470817000000
84.3575790000000	89.5561610000000	54.7248240000000	375.129715000000
85.2719460000000	88.7532780000000	51.8450810000000	374.345720000000
90.8893680000000	90.4058380000000	54.6284770000000	374.404728000000
85.3767220000000	88.1322540000000	55.9411620000000	375.033334000000
85.1914490000000	88.5032530000000	55.6056490000000	374.574050000000
87.2796400000000	88.8369240000000	56.1859590000000	375.442460000000
85.2216090000000	87.8175230000000	53.0561960000000	374.931872000000
85.7116680000000	87.7818060000000	58.4160250000000	374.179184000000
90.4478980000000	86.8747550000000	52.7469090000000	375.125781000000
88.4593570000000	89.0119090000000	55.5320860000000	374.457017000000
87.1412770000000	87.1971570000000	57.4689640000000	374.756977000000
89.0632960000000	87.2310940000000	58.6681360000000	375.531629000000
89.9541550000000	88.6258770000000	58.0376190000000	374.960065000000
84.3267230000000	87.5892860000000	57.2167410000000	374.646828000000
82.8126460000000	87.6960570000000	57.7059480000000	374.780416000000
84.8573700000000	88.3230770000000	50.0620650000000	374.528974000000
85.4191320000000	86.4578010000000	56.4241590000000	374.950066000000
86.7983870000000	87.1303960000000	59.8523810000000	374.099359000000
85.2806540000000	88.1937660000000	59.0791970000000	375.474751000000
85.4613940000000	88.1870340000000	58.4205800000000	374.485701000000
87.6029270000000	86.9674310000000	58.9622400000000	375.669152000000
89.6557310000000	87.5704490000000	57.9508070000000	376.315951000000
90.8388470000000	82.1130830000000	55.3709490000000	374.507993000000
88.8947380000000	83.7793920000000	56.9595640000000	374.718457000000
81.1754150000000	85.7473390000000	56.2834100000000	376.050249000000
81.1412990000000	87.5879170000000	58.2216290000000	375.954032000000
89.5070760000000	87.3647920000000	61.1215240000000	374.316707000000
89.6441680000000	87.9344360000000	58.0118560000000	379.224420000000
87.0941350000000	82.2398360000000	59.2405080000000	398.564324000000
90.3076410000000	86.7585000000000	57.5417610000000	398.845762000000
90.1185410000000	89.2018310000000	59.5724350000000	400.557667000000
91.0128580000000	89.6831480000000	61.2149910000000	399.892181000000
90.7496910000000	87.6866270000000	61.4389370000000	399.400279000000
87.7575510000000	90.9230440000000	63.9476670000000	400.360152000000
89.0514220000000	91.4512920000000	49.8851860000000	399.926275000000
93.0218510000000	92.3294650000000	52.8259850000000	400.046915000000
92.9996480000000	92.3910880000000	59.8140910000000	399.534196000000
89.9046260000000	92.3706020000000	58.3773500000000	400.250003000000
92.2607970000000	90.9783350000000	58.8674470000000	401.188239000000
91.0303610000000	92.5420480000000	58.5314350000000	400.630608000000
92.5701060000000	90.8819790000000	56.0572010000000	397.910476000000
89.4720100000000	89.9881120000000	56.1862890000000	400.124609000000
91.4247510000000	90.0460330000000	61.4350810000000	399.437815000000
91.6148720000000	91.4240600000000	57.7643750000000	400.078058000000
90.6575640000000	92.0424130000000	59.9910840000000	400.863364000000
92.8729250000000	89.3589830000000	59.7947140000000	398.584649000000
92.1602330000000	90.8221110000000	62.8766360000000	401.924044000000
87.8708650000000	86.1545070000000	62.9292150000000	400.506034000000
91.7354190000000	89.7903090000000	61.5410230000000	401.651949000000
92.2747130000000	91.1236500000000	59.7059890000000	399.240136000000
92.4917630000000	91.7373030000000	56.3867070000000	400.642738000000
92.6879080000000	91.8160690000000	59.1818760000000	399.770394000000
91.1769860000000	91.0101730000000	52.5789310000000	399.454534000000
88.6339110000000	91.2344880000000	56.9071750000000	400.346056000000
88.7290840000000	90.4865950000000	59.1952360000000	399.708763000000
91.1480040000000	89.7381580000000	61.4867170000000	400.313765000000
95.8836590000000	90.5186280000000	60.0447640000000	400.331959000000
91.6009910000000	89.6962940000000	62.9202770000000	399.166539000000
92.7143140000000	92.1613070000000	61.2591130000000	399.059340000000
91.3017540000000	90.9337390000000	62.0617820000000	399.391428000000
91.0123030000000	89.4645780000000	61.8190910000000	400.133789000000
91.2147260000000	87.6422810000000	61.3422070000000	400.536031000000
90.8555700000000	89.4168730000000	60.9810500000000	399.441093000000
91.1860910000000	89.7108350000000	58.4967560000000	400.970399000000
89.8742040000000	90.3696920000000	58.0216120000000	400.825337000000
91.8546570000000	90.1697190000000	61.5343240000000	400.526196000000
93.3249700000000	91.3876640000000	61.9737900000000	397.146642000000
91.5768880000000	90.2260560000000	56.2977900000000	400.583565000000
91.0317590000000	89.8413670000000	57.2208900000000	401.387230000000
90.7384650000000	91.2123990000000	61.0767190000000	398.674801000000
91.1783020000000	92.3131520000000	62.4020620000000	400.505543000000
93.1593960000000	92.8264480000000	61.2732480000000	399.512723000000
94.4700810000000	91.5800760000000	61.7725190000000	400.784194000000
90.6427900000000	92.0923960000000	61.8498320000000	400.099203000000
87.2365070000000	92.3210940000000	58.9624260000000	401.719317000000
90.8994700000000	89.9482110000000	59.7182070000000	399.457976000000
94.0873540000000	91.7674680000000	60.4068820000000	397.968665000000
91.9016690000000	91.4935350000000	59.1511590000000	400.911719000000
81.0498520000000	91.0119510000000	60.1898520000000	399.719417000000
83.2098720000000	86.2940710000000	60.4525690000000	399.831042000000
92.2033550000000	89.7275920000000	60.8567430000000	401.597366000000
92.7427480000000	88.6243640000000	61.3314030000000	400.697157000000
90.7426480000000	90.5568690000000	61.9186420000000	400.908276000000
89.3720710000000	91.3612910000000	54.1713290000000	400.803536000000
92.7083910000000	92.9471540000000	58.1077460000000	398.901984000000
92.8383160000000	93.2259580000000	63.0614280000000	398.509905000000
91.9486990000000	91.5707110000000	61.3072270000000	400.768131000000
84.5735040000000	91.8955600000000	62.0124920000000	398.687258000000
92.6483030000000	90.4559350000000	59.3770110000000	400.192305000000
91.5200200000000	92.0822620000000	59.3558230000000	399.314389000000
83.7281180000000	90.7299870000000	58.6038180000000	400.770426000000
87.1640020000000	90.3979440000000	60.5620350000000	399.608284000000
91.9661010000000	90.8290130000000	60.2101120000000	400.376871000000
90.7423310000000	89.9287990000000	63.7074840000000	400.193125000000
89.8444330000000	90.6895550000000	64.6956130000000	399.563044000000
89.0364640000000	90.9714050000000	61.6553810000000	400.051177000000
87.5331270000000	91.1357360000000	58.0927170000000	400.204435000000
80.2766100000000	90.9744620000000	61.2733330000000	399.784654000000
82.8335390000000	91.6425830000000	62.3713900000000	399.807602000000
94.0762290000000	87.7746400000000	61.5797200000000	400.519475000000
91.0007000000000	90.6421930000000	60.1129370000000	401.905522000000
87.3307410000000	93.2528380000000	61.2345150000000	400.575697000000
91.1175310000000	89.3229700000000	57.8895780000000	399.560913000000
92.0867510000000	86.6737150000000	57.8519900000000	400.028229000000
90.9435620000000	87.2628680000000	58.8553060000000	399.334058000000
92.2689820000000	91.9083900000000	56.8942760000000	399.959385000000
91.6910500000000	91.3432570000000	58.7612010000000	399.607137000000
91.4469110000000	90.9432020000000	60.4564790000000	399.538785000000
89.7404560000000	90.9284160000000	59.8833010000000	400.144935000000
89.3377750000000	93.0706680000000	53.9896560000000	400.659621000000
92.0226960000000	93.1580090000000	54.1706450000000	400.285572000000
86.5869380000000	91.9925190000000	51.6302550000000	399.572223000000
87.4377590000000	91.4284370000000	51.0437350000000	400.134116000000
89.8233110000000	92.0857380000000	54.1016320000000	400.246397000000
90.6758110000000	90.7263530000000	58.9680770000000	399.388805000000
91.9417820000000	85.0207730000000	57.9049460000000	400.579795000000
90.7903520000000	85.7140420000000	60.3555610000000	400.351301000000
91.9859320000000	88.6409030000000	60.2721170000000	400.380477000000
92.2133920000000	91.1355680000000	60.6298480000000	398.739055000000
87.5506100000000	91.8609060000000	58.2811110000000	399.920702000000
93.4990960000000	88.8186200000000	56.1947860000000	400.321469000000
92.4327560000000	90.1541530000000	60.9388970000000	400.374249000000
90.1156450000000	89.1293360000000	58.3746960000000	399.915293000000
91.0474160000000	88.8616750000000	61.8971700000000	399.731383000000
90.7421540000000	89.9188800000000	59.3606900000000	400.150672000000
92.7278930000000	91.8287910000000	55.5313460000000	400.859922000000
86.4372050000000	92.5174620000000	58.9683940000000	399.626151000000
90.5082190000000	91.1669180000000	57.3156830000000	398.741186000000
89.1356880000000	91.1373610000000	57.2335380000000	400.703713000000
90.3009080000000	91.9398960000000	59.9116510000000	400.339171000000
92.6077010000000	93.6820660000000	57.4493410000000	399.527311000000
88.0717550000000	92.0267710000000	56.4569040000000	399.498627000000
89.0057660000000	91.2573970000000	53.3904780000000	400.714204000000
88.5673030000000	93.3101760000000	57.1157940000000	400.084615000000
88.4602380000000	92.4657990000000	55.1516030000000	399.660408000000
94.2079090000000	90.6298890000000	52.5763330000000	401.254952000000
93.5107340000000	91.1176550000000	56.3705680000000	400.103793000000
92.4133880000000	91.5599840000000	60.8341320000000	399.388805000000
90.9858250000000	92.3905670000000	60.6883570000000	400.359988000000
94.7973310000000	93.4952810000000	64.7369070000000	399.972826000000
92.7696820000000	91.2387820000000	62.8383150000000	400.053963000000
88.5966740000000	91.7809620000000	61.3051310000000	400.774196000000
91.0847250000000	91.6821230000000	60.5261870000000	399.843663000000
91.8871560000000	91.6304940000000	59.0917440000000	401.212171000000
89.9982420000000	91.0621260000000	57.5655720000000	400.610939000000
90.3121560000000	90.6754300000000	60.3951480000000	398.830682000000
90.8034650000000	90.0294250000000	61.7698320000000	400.385395000000
90.8955650000000	89.2084830000000	62.6247030000000	399.491742000000
88.2668490000000	88.7711060000000	62.4776920000000	400.006920000000
88.9565160000000	91.7345110000000	58.4798900000000	399.502724000000
90.5322090000000	92.1604680000000	60.6610230000000	400.083795000000
90.8951150000000	91.0622020000000	54.8065480000000	401.241511000000
94.0952350000000	88.7792420000000	61.2962860000000	399.597302000000
91.2226930000000	91.4344180000000	61.3475690000000	400.176898000000
88.7467500000000	92.7459060000000	63.3135500000000	398.869202000000
87.3302030000000	91.7766310000000	62.4587010000000	400.806978000000
90.9179090000000	91.2139360000000	60.3936250000000	399.931192000000
93.3318350000000	90.5236170000000	62.1310450000000	400.097400000000
92.7617830000000	89.9723610000000	61.8627910000000	400.029704000000
91.5189370000000	91.1453380000000	60.1679900000000	401.332319000000
91.8805780000000	92.7400320000000	58.3361500000000	400.870085000000
92.1588740000000	91.9644010000000	57.8509600000000	398.803964000000
91.5551870000000	91.9874420000000	58.2724660000000	399.742201000000
89.5247910000000	90.9132580000000	60.8240870000000	400.168866000000
87.1401230000000	89.9203020000000	62.3895590000000	400.479972000000
90.4712510000000	90.2366120000000	61.2337990000000	400.536686000000
89.4190900000000	89.3199860000000	62.3034630000000	398.411721000000
89.0256560000000	89.7531030000000	63.3796140000000	401.169717000000
91.4277390000000	90.5418770000000	61.1376440000000	400.241315000000
90.2880390000000	89.3234550000000	61.9504830000000	399.067372000000
89.8578810000000	83.8592780000000	60.8002190000000	400.303930000000
92.7861960000000	88.2078780000000	58.7164770000000	399.957910000000
93.3346860000000	90.7523450000000	62.7399080000000	400.687978000000
88.9163560000000	92.0411510000000	61.1711750000000	400.737152000000
91.7975900000000	93.2973680000000	61.3467560000000	399.971351000000
90.8168040000000	91.7300390000000	57.8529480000000	400.997609000000
87.8425350000000	90.8092840000000	54.0517040000000	399.723679000000
91.1497730000000	90.0027810000000	58.4980310000000	400.263935000000
90.0966140000000	91.5308430000000	56.7181600000000	399.803504000000
80.0067140000000	92.3747680000000	55.7026690000000	399.877429000000
92.6227850000000	92.5121700000000	57.1328670000000	400.198534000000
93.7649440000000	91.5915290000000	60.8568360000000	399.757445000000
93.6498240000000	90.8042530000000	62.1277250000000	399.165556000000
88.2240650000000	90.9930560000000	57.4918410000000	400.748298000000
92.3373910000000	90.4205990000000	47.7562430000000	400.319010000000
91.2702520000000	92.2614190000000	55.8861690000000	399.951354000000
90.8337860000000	92.7039940000000	59.5745600000000	399.821207000000
91.8405880000000	92.0780600000000	57.5992410000000	399.957255000000
88.6152020000000	92.8063840000000	58.4660140000000	398.376644000000
85.3761720000000	92.4726920000000	58.8942240000000	400.415882000000
91.0967500000000	92.9091270000000	60.0478870000000	400.283277000000
91.9433950000000	90.0562300000000	61.2011050000000	398.936406000000
93.6921380000000	91.3458550000000	61.1758970000000	400.107890000000
91.9741720000000	91.8570170000000	61.5285040000000	400.359333000000
89.1511510000000	90.4821280000000	62.2298400000000	399.795309000000
94.5760760000000	89.6594730000000	60.2423610000000	399.429947000000
93.9435880000000	91.0455160000000	61.6087330000000	400.099859000000
92.7172790000000	91.6178060000000	58.7841130000000	417.115152000000
94.9566830000000	92.6516330000000	60.4041350000000	424.417630000000
95.7921830000000	93.6682640000000	60.6820880000000	425.920874000000
94.0968280000000	93.9506010000000	54.8677570000000	424.370423000000
87.4933570000000	95.0573040000000	56.9806290000000	424.407303000000
86.2176670000000	94.4442660000000	60.1268960000000	425.223097000000
94.2009800000000	92.4072300000000	63.3314060000000	424.537286000000
94.7531440000000	91.3154980000000	63.7316410000000	424.122423000000
92.8317090000000	92.0701290000000	63.4786220000000	424.224049000000
91.6930840000000	93.5590670000000	64.8538200000000	426.228538000000
87.7177090000000	91.7412560000000	66.3281070000000	425.058857000000
93.6948550000000	92.8398230000000	59.9695160000000	423.780173000000
97.3768350000000	95.1747010000000	61.3754140000000	426.399663000000
95.8615370000000	93.1576680000000	62.7352300000000	424.431071000000
96.3997200000000	92.9763250000000	65.2814010000000	425.030500000000
95.2182280000000	95.5118410000000	63.5774280000000	426.076591000000
95.8600150000000	95.4818750000000	62.9917790000000	423.433498000000
95.3136910000000	93.8979420000000	62.2829970000000	424.689561000000
95.1082910000000	94.0701710000000	59.9725730000000	424.027517000000
91.9258860000000	95.3773770000000	61.3666070000000	424.836591000000
95.8686160000000	94.6980830000000	65.2955740000000	423.894420000000
94.5535990000000	95.4965510000000	66.8629420000000	425.486505000000
96.2580550000000	96.9388930000000	66.4657480000000	425.614029000000
96.4020970000000	94.7571190000000	63.6593960000000	424.713820000000
93.8178900000000	94.8845640000000	60.7925250000000	423.327774000000
95.0247560000000	95.5202210000000	64.3536990000000	425.844491000000
93.4561600000000	93.3249170000000	66.2854650000000	424.301580000000
94.6551170000000	93.4389230000000	66.1467340000000	423.534796000000
96.0846290000000	88.2641090000000	66.1611170000000	425.133273000000
92.5340280000000	92.5128210000000	65.5727880000000	426.170185000000
94.0342610000000	93.1297720000000	61.0640090000000	424.923956000000
93.9364280000000	93.7545660000000	57.4641860000000	424.690381000000
96.4986050000000	95.2780240000000	58.6253960000000	424.803972000000
96.6828090000000	95.4920390000000	59.9378200000000	425.876781000000
97.0888180000000	93.8091710000000	57.2962610000000	424.458772000000
93.9207080000000	95.6634160000000	61.6580020000000	425.945625000000
90.9820990000000	95.6553790000000	63.5648340000000	424.333215000000
95.1432010000000	95.8430420000000	63.8282460000000	425.682381000000
95.6910200000000	93.6465080000000	66.2762600000000	424.346983000000
96.0819600000000	95.2405470000000	65.9072720000000	425.595343000000
93.4463180000000	95.0168310000000	65.8697820000000	424.187168000000
93.2090120000000	95.5608190000000	63.3749510000000	425.853506000000
91.2269690000000	94.2280870000000	64.4018140000000	426.071182000000
90.9595750000000	94.3664440000000	66.0500750000000	423.630685000000
94.5059860000000	94.8928860000000	65.6102980000000	425.895140000000
97.1156070000000	94.5302610000000	65.6754910000000	425.935790000000
97.0432560000000	94.5810080000000	62.6157430000000	424.871668000000
94.5741890000000	91.1198640000000	62.7672530000000	424.941331000000
94.0741300000000	94.8458450000000	60.8975320000000	423.613146000000
95.8145310000000	96.3518750000000	61.1212990000000	425.381273000000
94.2992680000000	95.6863970000000	63.0412760000000	425.439134000000
96.1915980000000	95.6357030000000	63.4933400000000	425.587311000000
90.4137610000000	95.4624170000000	62.5028000000000	425.082132000000
94.2462400000000	93.9556710000000	63.2655050000000	424.829870000000
98.9931360000000	94.8001350000000	65.5189260000000	423.621178000000
95.9272540000000	95.9620580000000	61.1913350000000	422.883078000000
96.3618930000000	96.0364830000000	63.7472690000000	425.415203000000
94.2832110000000	95.2944390000000	62.4074740000000	424.687922000000
93.4548910000000	95.8212440000000	64.0570840000000	426.306561000000
95.2533390000000	94.4031280000000	63.0918920000000	424.580559000000
94.8024620000000	95.3837360000000	64.6963700000000	425.310954000000
93.7048140000000	95.4746830000000	64.5026260000000	423.929170000000
94.0908090000000	94.7830380000000	64.2798190000000	425.656319000000
94.6298460000000	94.6358940000000	63.2646390000000	424.639404000000
96.9667890000000	94.9336770000000	64.7061040000000	424.588263000000
96.6369290000000	95.0194810000000	61.3340520000000	424.295351000000
92.8076500000000	95.3319060000000	63.8499610000000	424.722344000000
94.5457030000000	94.2962550000000	65.6764990000000	424.534991000000
96.7558610000000	94.3149610000000	64.4509200000000	425.171629000000
93.2605120000000	95.2065240000000	61.1473150000000	424.521059000000
92.6305150000000	94.8133160000000	59.4288290000000	424.943134000000
95.0494620000000	94.7844430000000	59.9571410000000	425.207525000000
95.0635690000000	95.3013800000000	63.1078740000000	425.616324000000
95.5138000000000	95.1845860000000	64.8337180000000	425.044924000000
86.0258950000000	96.5416210000000	66.0011670000000	425.565347000000
93.1970480000000	95.2418200000000	65.3372560000000	425.305709000000
95.5813920000000	95.2221720000000	64.5107190000000	425.643370000000
93.1140010000000	95.8924540000000	64.8190140000000	425.064757000000
93.2538050000000	95.4642660000000	64.8646710000000	424.635962000000
91.8071700000000	93.6572460000000	64.3937630000000	426.187888000000
92.7736780000000	94.4320220000000	63.8907750000000	422.935203000000
96.6524860000000	94.0437100000000	60.2051900000000	423.847213000000
96.3222790000000	96.0108690000000	62.8608560000000	425.648779000000
95.0252560000000	96.1500680000000	64.2625240000000	426.314428000000
93.3455400000000	95.5645430000000	67.1941720000000	425.407827000000
92.4405100000000	94.6284970000000	66.1990040000000	423.688710000000
91.9040900000000	94.5114090000000	60.8139470000000	424.930349000000
91.1141980000000	94.5736370000000	62.2653040000000	424.077019000000
93.5338270000000	92.4094600000000	59.7196820000000	425.593212000000
95.5589800000000	92.2771030000000	60.5678510000000	424.610883000000
91.2958640000000	93.3094840000000	63.9405500000000	424.935430000000
88.6789570000000	95.5448150000000	59.8088670000000	425.179169000000
95.3788750000000	93.0430380000000	57.7070170000000	423.399076000000
97.3688570000000	93.4777080000000	61.1572080000000	425.113767000000
96.2828290000000	93.3776420000000	61.3387540000000	425.736636000000
95.7966390000000	94.4498950000000	64.3574740000000	424.725458000000
92.7481320000000	94.4735070000000	65.2625020000000	424.629077000000
93.8013720000000	94.5448180000000	62.7520840000000	424.514994000000
95.4098310000000	95.1933020000000	61.9603900000000	425.906613000000
93.0442600000000	93.6999730000000	62.6422130000000	425.316855000000
91.3567510000000	94.7738750000000	64.4690540000000	424.709558000000
88.4964330000000	95.2375460000000	64.1986190000000	426.108062000000
84.5177300000000	96.3332390000000	62.5460670000000	425.016731000000
96.3286630000000	91.4402380000000	64.3271570000000	426.785022000000
93.5279150000000	94.8194820000000	64.0126750000000	425.540268000000
94.5724520000000	92.6787600000000	65.9903710000000	426.271975000000
95.1514830000000	94.1758900000000	65.6502350000000	424.877077000000
93.6310700000000	93.5726830000000	66.0320710000000	424.458608000000
89.2316880000000	93.4099010000000	64.7008370000000	425.827116000000
87.5919870000000	93.1126950000000	64.9925470000000	425.323084000000
95.0975670000000	92.3622500000000	65.6118160000000	424.087182000000
98.8045740000000	93.1025520000000	66.0351370000000	425.935954000000
94.1134960000000	89.6224530000000	66.0737020000000	425.964639000000
94.0230620000000	92.1623150000000	66.5700850000000	425.314233000000
93.5096700000000	91.6603650000000	57.3645580000000	424.931988000000
93.0970340000000	94.8908580000000	60.0591420000000	424.281582000000
94.3106190000000	94.4032830000000	61.4964700000000	424.678743000000
88.9510350000000	92.8809060000000	52.7212470000000	425.405532000000
89.0880640000000	93.6390730000000	56.3932780000000	424.452379000000
94.2205300000000	95.1319950000000	63.7956600000000	425.762042000000
94.0510870000000	95.6334730000000	64.8818030000000	424.703658000000
92.6307700000000	94.4709670000000	66.4170250000000	425.077543000000
94.1091610000000	94.2175000000000	63.0400910000000	426.318526000000
97.2386300000000	92.7738530000000	63.9661860000000	425.737292000000
94.8371860000000	91.8873980000000	64.8153280000000	423.226148000000
95.5220260000000	94.4150970000000	65.2271880000000	424.715295000000
96.4647710000000	94.6696590000000	65.3035460000000	426.980734000000
94.5784350000000	94.3758310000000	59.6980910000000	424.874783000000
96.1246520000000	95.6319920000000	56.1808070000000	425.872192000000
94.0909280000000	95.8497250000000	60.9503230000000	424.081936000000
94.6493070000000	92.9350220000000	56.2202240000000	426.347539000000
94.1926190000000	91.9216110000000	59.2929450000000	426.158220000000
94.0785040000000	88.5271360000000	64.3627750000000	424.983621000000
96.3533490000000	91.5298520000000	67.0304860000000	423.956543000000
97.3920130000000	93.5700360000000	67.8807740000000	425.304726000000
95.8160360000000	92.9149680000000	65.3079380000000	424.566627000000
95.4240090000000	94.2077900000000	62.9525070000000	425.347507000000
93.9057690000000	94.5336780000000	65.5921290000000	424.990997000000
89.2196580000000	94.6234450000000	64.0398350000000	425.773844000000
85.1874880000000	95.6228380000000	63.8736530000000	424.912646000000
97.1620170000000	95.7635540000000	62.7632610000000	425.184578000000
96.8977730000000	93.1147810000000	59.9172790000000	425.368324000000
94.0361850000000	94.4352620000000	59.6166730000000	425.845802000000
91.4152840000000	95.0498360000000	62.1041880000000	424.069479000000
92.2112860000000	95.6006370000000	65.9202880000000	425.024763000000
95.2664450000000	97.0521360000000	66.2398680000000	424.421400000000
94.3242130000000	91.9960510000000	65.5968590000000	424.967557000000
95.0542950000000	94.9547110000000	65.8501840000000	425.100982000000
94.9899230000000	95.8795680000000	65.6713620000000	423.697561000000
94.7919090000000	95.6122200000000	63.7273950000000	424.973130000000
94.0548050000000	91.5966390000000	66.2295080000000	424.885929000000
93.1233800000000	94.1588880000000	66.2595880000000	424.946740000000
95.1292510000000	94.5664770000000	68.0502110000000	426.159203000000
96.2410740000000	95.7855810000000	66.5942450000000	425.423726000000
91.3384260000000	95.4445700000000	66.4167600000000	424.150616000000
94.7032660000000	95.4518030000000	65.0027650000000	425.883502000000
93.4062540000000	94.0008000000000	58.5111510000000	422.596231000000
94.3308930000000	91.4362600000000	63.2155810000000	426.251978000000
92.7678840000000	94.6131560000000	64.6066230000000	425.127044000000
92.7592890000000	94.1369710000000	65.6584460000000	423.463002000000
94.4665310000000	92.8040230000000	62.6076220000000	423.666418000000
93.0876840000000	95.2889850000000	62.5402540000000	424.064562000000
93.2433000000000	96.2374060000000	65.3074960000000	425.833836000000
95.4313090000000	92.1517800000000	66.2667250000000	426.516697000000
94.2174000000000	93.7420310000000	63.7948470000000	425.366849000000
92.3888240000000	94.3064540000000	64.9723720000000	424.908057000000
96.7229540000000	94.6109040000000	64.5711760000000	424.216345000000
94.1825640000000	92.6970570000000	62.2533520000000	426.325575000000
93.9495740000000	95.2333430000000	64.8804700000000	432.385102000000
93.6988960000000	95.6195540000000	64.9152450000000	447.541952000000
97.9622570000000	96.4799080000000	66.3144750000000	449.268445000000
97.1481720000000	95.7334150000000	67.8428560000000	449.430883000000
97.4325270000000	97.3047440000000	69.0738940000000	450.272411000000
96.3788100000000	97.9596730000000	69.3584330000000	450.493202000000
95.4074580000000	97.6257380000000	67.0966100000000	449.348763000000
93.7052610000000	99.1586560000000	66.3895780000000	449.043557000000
96.0441490000000	98.4360990000000	67.1813650000000	450.138986000000
96.0784790000000	96.0297530000000	69.2994970000000	450.264707000000
97.9684230000000	96.2742130000000	70.2144240000000	451.384231000000
99.1920970000000	97.4580230000000	68.1592250000000	449.588895000000
101.177113000000	98.2613220000000	67.7515020000000	449.896395000000
95.4648590000000	96.9967230000000	62.3902610000000	451.192945000000
97.3899470000000	97.5951840000000	65.4190370000000	448.890463000000
93.9226510000000	97.3361130000000	64.2336850000000	449.859679000000
97.8356670000000	96.7257150000000	63.8969020000000	448.895872000000
98.3933850000000	97.8148950000000	65.8670970000000	450.862169000000
91.4986760000000	98.0916770000000	66.8909150000000	450.881839000000
100.770315000000	98.5945890000000	69.0310160000000	449.879840000000
97.4446040000000	93.6276140000000	66.7765140000000	450.723663000000
96.6667020000000	96.8782400000000	68.8510970000000	450.241104000000
97.8810130000000	98.2099190000000	68.1614190000000	450.142264000000
99.9373090000000	95.4230300000000	63.0462840000000	449.961796000000
91.9784900000000	97.4947810000000	64.4259840000000	448.756710000000
88.6186630000000	97.6988960000000	66.4027650000000	450.877413000000
96.9126640000000	97.5668840000000	64.8645990000000	451.032475000000
98.8079480000000	96.7420050000000	66.2550570000000	449.869841000000
98.0237560000000	95.3729090000000	64.7424940000000	449.916720000000
98.5586630000000	96.2335500000000	68.0139820000000	449.814767000000
99.3327490000000	97.9794480000000	65.2349270000000	450.199634000000
98.6665880000000	97.5066270000000	66.7920330000000	449.852303000000
96.4790460000000	96.5761450000000	67.4810330000000	449.767232000000
95.9963390000000	93.1057400000000	66.1137590000000	451.352432000000
95.2360640000000	95.9541090000000	69.2861180000000	450.102925000000
95.9220510000000	97.6694770000000	67.7125190000000	450.632364000000
91.5560010000000	98.0898640000000	67.0321460000000	450.783983000000
96.2622130000000	97.4567710000000	65.0796630000000	449.778214000000
100.817247000000	98.7246030000000	66.1614090000000	449.217796000000
100.190772000000	98.7125590000000	63.3436140000000	450.689077000000
98.0785740000000	98.6204170000000	61.8886740000000	449.181736000000
96.5907100000000	99.4624150000000	61.2623450000000	449.632004000000
97.1176240000000	98.2599640000000	62.0850280000000	449.621841000000
99.0857620000000	100.237283000000	59.7568980000000	450.882494000000
96.4974780000000	100.312653000000	63.8234080000000	449.327618000000
100.669110000000	100.033603000000	68.4754530000000	452.042669000000
93.4449510000000	99.5306890000000	63.4884070000000	449.056342000000
100.133314000000	97.1953160000000	67.5041000000000	450.341418000000
100.017575000000	97.4724680000000	67.1985180000000	450.123414000000
98.6047420000000	99.3275230000000	69.6599920000000	450.124234000000
102.190063000000	99.6767190000000	68.9350300000000	450.189307000000
98.4519700000000	96.2328270000000	69.0851860000000	449.544147000000
96.9154590000000	97.1069550000000	67.6722290000000	449.762478000000
99.2148380000000	98.2472080000000	66.7190390000000	448.581487000000
97.6685580000000	98.3472570000000	68.2252080000000	452.624559000000
92.5570290000000	98.3448240000000	63.6067230000000	449.274182000000
99.5044050000000	98.0804290000000	65.3856740000000	450.389281000000
98.2061170000000	97.6328610000000	66.5365220000000	449.412853000000
95.8401680000000	97.8862750000000	67.5551190000000	449.636430000000
95.0066060000000	97.6822090000000	64.5196510000000	449.771002000000
95.2008910000000	97.7004080000000	66.3665210000000	450.401902000000
101.168187000000	99.1338210000000	65.6273480000000	450.505003000000
99.4102510000000	98.6865730000000	68.3926330000000	449.370071000000
95.2490860000000	98.3237440000000	65.5843100000000	451.154917000000
91.2922580000000	98.9307890000000	68.4748540000000	449.313521000000
95.7203380000000	99.3468110000000	66.9859660000000	449.397936000000
94.8680250000000	96.3289740000000	65.0671060000000	450.148985000000
99.4696760000000	95.5738440000000	66.1155520000000	449.352533000000
92.3830420000000	96.6301020000000	66.3701820000000	449.684292000000
98.4837990000000	96.2058880000000	67.4043060000000	450.672522000000
98.8980830000000	96.3677260000000	69.3593510000000	450.074732000000
99.3933720000000	96.4131470000000	67.5833320000000	449.547097000000
98.0679180000000	96.6175630000000	64.8292790000000	450.360760000000
98.1872620000000	97.7741190000000	63.1204740000000	448.817357000000
98.6287240000000	98.6312120000000	65.7890810000000	450.646952000000
98.0870460000000	97.7877380000000	63.9001480000000	450.416818000000
98.5037400000000	99.2350370000000	68.1079000000000	450.611547000000
98.5781970000000	98.9383080000000	68.5087490000000	449.473992000000
98.0882990000000	97.8165600000000	69.6128530000000	451.101482000000
96.9720150000000	98.5197280000000	68.4616040000000	448.750153000000
99.9517550000000	98.2365940000000	69.0778820000000	450.216189000000
98.4095250000000	96.9284400000000	67.2372030000000	450.589910000000
97.0310850000000	98.6791900000000	67.4144100000000	450.749889000000
97.4179230000000	97.7264700000000	68.0172600000000	449.368760000000
100.189451000000	97.5062090000000	68.9674720000000	450.230286000000
99.4284800000000	98.7898670000000	67.5405260000000	451.230973000000
97.8625290000000	99.0874320000000	62.6131920000000	449.807882000000
97.8658940000000	98.3381630000000	64.0224250000000	451.477662000000
98.5320780000000	96.3605900000000	67.0266230000000	450.274870000000
100.128700000000	97.3553140000000	67.9549160000000	448.209077000000
99.3242980000000	96.8511350000000	64.0567970000000	450.171441000000
97.2244110000000	97.6975380000000	65.6922120000000	450.004905000000
95.3668910000000	99.0894300000000	64.7256490000000	448.787197000000
94.6812890000000	98.2783270000000	68.1161450000000	449.264839000000
97.1387070000000	97.7757120000000	65.9035350000000	451.408654000000
94.4223130000000	98.5913720000000	64.4284340000000	449.811324000000
100.599600000000	97.1794690000000	63.7047890000000	449.876398000000
98.4668080000000	97.1712970000000	63.9104700000000	451.506674000000
98.2980530000000	97.8052530000000	68.6546900000000	451.340303000000
100.420262000000	98.9366980000000	67.1993400000000	449.597418000000
98.2082170000000	98.9535170000000	66.8281100000000	449.524149000000
96.7063540000000	97.7973010000000	65.9111950000000	450.453207000000
97.5234650000000	99.3595870000000	65.2476030000000	449.526772000000
92.3382530000000	99.1062320000000	65.3270300000000	449.750513000000
96.5397070000000	98.3305820000000	67.1082250000000	450.957566000000
97.1841050000000	98.3101110000000	43.2546830000000	450.083911000000
96.7555530000000	95.3003720000000	56.5984290000000	449.346140000000
98.7380670000000	94.9920540000000	58.9469130000000	449.316308000000
99.9578960000000	92.7847680000000	66.0955140000000	450.697765000000
99.8460280000000	96.1584900000000	68.4979250000000	449.481696000000
100.094339000000	95.9740600000000	66.9473810000000	450.955108000000
97.1849480000000	97.9331620000000	69.0120540000000	450.179309000000
95.7715390000000	99.4947570000000	68.9053680000000	451.497659000000
95.2343980000000	98.1255780000000	67.9903800000000	449.808866000000
96.0818190000000	99.1421140000000	68.1117970000000	450.292245000000
91.5513820000000	98.0021830000000	62.2374460000000	451.400951000000
98.5091870000000	98.3893440000000	67.8371110000000	448.435768000000
98.1005710000000	98.0281720000000	65.8229460000000	449.760184000000
101.574507000000	98.8966380000000	69.0311080000000	451.053292000000
95.4935820000000	97.1946790000000	65.0723200000000	448.783919000000
91.1773010000000	95.8883570000000	64.7119730000000	451.145247000000
98.6150610000000	97.8082750000000	67.6420190000000	450.811356000000
98.6982100000000	97.1522830000000	68.4928670000000	448.066965000000
95.7755500000000	96.9592090000000	66.7292690000000	450.049162000000
97.0469170000000	97.6986010000000	68.1355720000000	451.116070000000
102.218872000000	98.0008050000000	70.5901230000000	449.282378000000
97.4689650000000	98.6719210000000	69.8984500000000	451.166719000000
95.4750410000000	98.8603530000000	69.6992390000000	449.675113000000
101.107410000000	99.3177190000000	65.6060880000000	449.068636000000
97.9220330000000	98.2549560000000	69.0468990000000	450.614333000000
97.5366160000000	91.6497780000000	69.4109560000000	449.263200000000
98.2212060000000	95.5721760000000	62.0739800000000	449.353352000000
97.5502150000000	98.4312840000000	65.7379640000000	450.475991000000
98.1260460000000	99.1227290000000	66.0369850000000	449.669868000000
98.6481590000000	99.4751810000000	66.8917780000000	451.137051000000
97.5630140000000	97.6885420000000	66.2528320000000	450.564504000000
89.6808660000000	96.1424490000000	67.9601250000000	448.510677000000
95.9645110000000	95.1963840000000	65.3524580000000	452.184126000000
94.8878860000000	96.7143920000000	64.3298300000000	449.510872000000
94.6983730000000	95.7130010000000	66.8396560000000	449.082732000000
96.6744490000000	97.6565660000000	69.4287200000000	450.081453000000
94.4426370000000	97.3512010000000	69.3329800000000	450.925440000000
100.080108000000	100.032266000000	67.3427980000000	449.762151000000
95.4068290000000	96.4662120000000	62.2508730000000	448.504612000000
99.2384660000000	98.0191510000000	66.0819140000000	448.745891000000
98.3979310000000	97.6520560000000	67.4196170000000	451.454386000000
98.4409610000000	96.5801270000000	67.2021750000000	449.731007000000
99.2775350000000	97.8171900000000	65.6587130000000	450.165048000000
99.4364420000000	97.2496210000000	67.4884110000000	451.475695000000
97.5593440000000	95.8083500000000	68.0383500000000	448.378891000000
96.8559320000000	97.8636140000000	70.1185910000000	450.528115000000
97.3743060000000	97.4377000000000	63.7106690000000	450.571716000000
96.1731770000000	98.2623350000000	65.2741720000000	448.591158000000
97.7226330000000	98.3238410000000	65.8237770000000	450.167835000000
100.935456000000	98.2486790000000	68.6309860000000	450.237170000000
100.653733000000	98.5629300000000	70.6931770000000	449.641839000000
96.9514140000000	97.4595510000000	65.1337630000000	451.172292000000
97.8175330000000	98.5891850000000	67.6650720000000	449.962780000000
98.3705150000000	98.9217630000000	66.8323750000000	451.431602000000
98.1411730000000	97.7241890000000	68.4899330000000	448.906854000000
98.5384930000000	98.4584880000000	69.3444650000000	450.537622000000
97.5812990000000	98.1163110000000	63.7718330000000	450.694978000000
100.011138000000	99.3900140000000	66.3539100000000	450.158328000000
99.8299820000000	97.5098350000000	68.6755480000000	451.092303000000
98.1199100000000	97.6944980000000	67.7230720000000	450.582862000000
98.0311210000000	97.6670550000000	67.3210580000000	448.957011000000
97.6619650000000	97.6911670000000	67.7697360000000	450.736940000000
93.9581870000000	98.3301880000000	66.1970270000000	450.057194000000
95.9361490000000	98.3282220000000	65.7704430000000	460.287973000000
96.5839660000000	99.4375840000000	66.7559530000000	474.212691000000
96.2996730000000	99.2048190000000	67.2322250000000	473.461151000000
101.170481000000	99.6832300000000	67.4076860000000	475.485638000000
100.263149000000	99.8437780000000	63.2418710000000	475.452691000000
102.505218000000	100.070043000000	66.1308510000000	475.121751000000
101.755484000000	101.318314000000	69.5670130000000	476.100802000000
100.502201000000	99.4983800000000	69.0497480000000	475.010619000000
99.4040530000000	96.2541880000000	69.4774500000000	475.278124000000
100.210242000000	96.6975990000000	65.6344600000000	474.912435000000
98.8453260000000	97.7109970000000	65.6753740000000	473.993212000000
96.8324530000000	98.7636460000000	65.7300660000000	474.577397000000
97.7155420000000	101.294264000000	65.6205450000000	476.051956000000
100.985344000000	101.668398000000	70.0237130000000	474.965215000000
103.891754000000	101.871782000000	69.6347660000000	474.571005000000
99.5279130000000	101.915767000000	68.1567850000000	475.634634000000
98.7467580000000	101.346313000000	66.1385420000000	475.260586000000
101.176860000000	102.279540000000	66.7091380000000	474.376932000000
102.149172000000	102.926570000000	68.9969690000000	476.205707000000
96.6815130000000	101.294163000000	70.0842410000000	473.958135000000
97.0721940000000	100.703633000000	70.7317410000000	475.590378000000
94.7452510000000	99.8027830000000	68.7117280000000	475.192890000000
99.6207240000000	99.6604840000000	69.3985220000000	474.015832000000
89.8666480000000	101.341639000000	68.3308200000000	475.699872000000
98.6783280000000	101.698804000000	65.6899850000000	475.122899000000
103.530506000000	100.896445000000	66.8170820000000	474.300385000000
104.006877000000	100.001686000000	66.3064860000000	474.191055000000
104.231978000000	99.5586470000000	58.4444180000000	474.836379000000
102.694361000000	100.074291000000	64.8862700000000	475.427777000000
100.668372000000	101.651555000000	66.0317310000000	473.539665000000
100.548190000000	101.418333000000	65.9557030000000	475.685775000000
100.247105000000	100.353560000000	67.4812980000000	473.748326000000
100.737275000000	100.823145000000	66.9137400000000	475.529075000000
97.5128860000000	101.474343000000	63.0324490000000	474.711314000000
100.908772000000	102.317553000000	66.3238930000000	476.002619000000
99.7092430000000	102.729221000000	70.1044870000000	476.842508000000
99.9016180000000	101.788228000000	65.5923110000000	474.996522000000
98.5250740000000	95.9799210000000	69.4690700000000	474.529371000000
95.6692600000000	98.0837580000000	70.3860370000000	474.744916000000
101.952281000000	98.4972400000000	70.1344700000000	475.019634000000
101.554869000000	98.8192970000000	68.1282450000000	474.485114000000
96.9755820000000	101.275567000000	70.2460030000000	475.376144000000
98.8524700000000	102.802290000000	68.7962710000000	475.679711000000
100.046314000000	103.483081000000	62.9415210000000	474.409878000000
103.978447000000	103.104920000000	68.9647960000000	474.335954000000
98.1429330000000	101.937031000000	68.4330340000000	475.720197000000
99.0347570000000	101.892848000000	70.8748240000000	475.286156000000
100.453654000000	101.521420000000	69.6663930000000	475.573659000000
99.0380790000000	102.145802000000	64.4969510000000	474.243835000000
101.858408000000	101.730700000000	67.7095490000000	474.909320000000
102.890951000000	102.548842000000	67.6809150000000	475.203216000000
98.6216890000000	101.971651000000	67.4539610000000	475.483671000000
99.3454290000000	101.801806000000	70.5872510000000	474.625751000000
100.622280000000	102.050698000000	66.5058020000000	476.045564000000
103.643340000000	101.802011000000	69.8908950000000	474.708036000000
102.883554000000	101.175283000000	71.0285270000000	474.462822000000
98.6151440000000	101.266235000000	71.2702480000000	476.313069000000
96.2805420000000	102.418754000000	69.6729860000000	475.041106000000
97.8131820000000	103.274925000000	67.9292150000000	475.032419000000
94.7486870000000	102.446476000000	70.0343730000000	475.693807000000
100.439149000000	102.228953000000	69.2159220000000	472.784519000000
104.421132000000	101.460971000000	70.6754690000000	477.031827000000
98.5455480000000	100.633242000000	67.6992700000000	475.220755000000
102.304563000000	100.606128000000	71.8442590000000	474.375293000000
103.254971000000	101.794385000000	67.6772400000000	473.946005000000
102.757627000000	102.518033000000	68.5186700000000	475.647092000000
101.437166000000	99.5053920000000	69.5203420000000	473.449185000000
102.945091000000	97.2113870000000	70.8186450000000	474.556252000000
98.1755720000000	99.5952340000000	70.2092890000000	476.487964000000
97.7585270000000	100.080779000000	70.7117830000000	475.456133000000
100.634406000000	100.603149000000	70.4398580000000	474.783599000000
98.6432020000000	100.227569000000	71.2330370000000	475.065038000000
102.566447000000	101.905659000000	67.4371770000000	475.357458000000
100.489523000000	101.886174000000	67.1843090000000	475.036025000000
95.0322240000000	101.176287000000	68.6714080000000	474.967510000000
98.3689650000000	102.417440000000	69.2413330000000	474.004194000000
99.9925480000000	101.601386000000	69.1154080000000	475.342378000000
101.214881000000	99.7816190000000	69.5643480000000	475.789368000000
103.081102000000	99.8652610000000	67.9452180000000	474.968165000000
100.946703000000	101.389000000000	68.4783680000000	475.304678000000
102.244451000000	101.168330000000	70.1576700000000	475.846902000000
101.280289000000	101.025645000000	71.3856070000000	475.339755000000
98.6927450000000	101.284530000000	72.0095590000000	475.556776000000
99.0778000000000	100.582759000000	73.5883380000000	475.349098000000
103.247084000000	100.281723000000	73.4547220000000	475.318938000000
99.4238510000000	97.6566910000000	72.4847310000000	473.937973000000
101.096937000000	101.338890000000	70.0209630000000	475.380570000000
97.9611830000000	101.129095000000	69.6589520000000	474.579364000000
98.5124560000000	100.473066000000	64.8450020000000	474.469051000000
98.7425200000000	100.847322000000	60.5684110000000	474.828839000000
100.922719000000	100.359892000000	64.5012700000000	475.563660000000
100.777087000000	99.9482750000000	66.9619730000000	473.797664000000
101.964208000000	101.566482000000	69.0519560000000	474.838674000000
101.730505000000	101.482191000000	69.1518100000000	475.802645000000
95.7444080000000	100.849783000000	67.5668330000000	474.681973000000
98.3955680000000	100.188702000000	70.6836550000000	473.472625000000
101.463606000000	101.344795000000	71.6247640000000	475.529239000000
96.6873980000000	99.5743690000000	73.4747310000000	474.257439000000
101.279360000000	101.356293000000	73.3750260000000	474.236786000000
101.398378000000	99.7095340000000	74.0509000000000	476.042449000000
99.0072260000000	102.244474000000	69.4866410000000	475.388438000000
102.082471000000	101.739158000000	66.3779480000000	474.651814000000
100.978187000000	101.981747000000	65.6000700000000	474.253505000000
96.6345870000000	102.207017000000	66.7614440000000	476.049826000000
96.2773790000000	102.221342000000	71.3435190000000	474.755079000000
99.3051900000000	102.803565000000	70.5744690000000	474.582314000000
102.928064000000	101.663689000000	70.1864290000000	476.185217000000
101.654328000000	99.4063620000000	71.7956410000000	474.128604000000
98.8779810000000	99.8914820000000	69.0205390000000	474.704266000000
100.909581000000	100.364783000000	58.9661080000000	475.009307000000
98.3417500000000	98.6630310000000	65.8057900000000	473.731771000000
101.076758000000	100.603197000000	64.2413130000000	476.193413000000
101.601922000000	102.117447000000	61.5217630000000	475.413680000000
102.658246000000	102.318863000000	62.3725520000000	474.305794000000
103.365755000000	99.9354660000000	63.6597710000000	474.688694000000
103.004831000000	100.611063000000	67.3332450000000	474.809825000000
100.718428000000	99.8650270000000	70.6826900000000	473.845854000000
99.9010240000000	101.279517000000	69.6827640000000	474.935547000000
102.000909000000	100.392173000000	71.1435560000000	475.980982000000
102.250222000000	101.497619000000	67.2759410000000	473.702267000000
104.384164000000	100.349884000000	69.8638080000000	475.587428000000
105.527767000000	101.525129000000	71.0761960000000	475.389749000000
103.776737000000	102.158784000000	68.7845920000000	476.365522000000
103.266211000000	101.606770000000	70.3165480000000	473.831922000000
101.231193000000	101.550461000000	70.0776700000000	476.102114000000
100.246073000000	99.9206530000000	71.9637480000000	475.298449000000
99.2170770000000	99.8538320000000	68.9951320000000	474.151224000000
101.227646000000	101.043105000000	71.7837610000000	475.536779000000
101.744863000000	99.7150200000000	70.6795690000000	474.903420000000
100.688417000000	100.171513000000	69.3080310000000	474.141717000000
102.620276000000	100.248084000000	71.3348810000000	475.039795000000
99.7784600000000	101.300900000000	70.3822470000000	476.706788000000
100.903721000000	100.622556000000	70.2866970000000	474.828675000000
101.468637000000	99.9466000000000	70.6199760000000	475.496620000000
102.847362000000	100.338137000000	72.2912670000000	474.453315000000
101.286222000000	96.8771900000000	72.2014810000000	474.670008000000
102.132096000000	97.9043880000000	73.2063590000000	475.786582000000
101.232626000000	101.192365000000	67.9801810000000	474.307925000000
103.433597000000	100.413225000000	70.1411830000000	475.402370000000
102.661078000000	100.563118000000	72.9136000000000	475.206330000000
92.7877470000000	101.111044000000	71.0967740000000	474.719509000000
88.3156640000000	101.669183000000	69.7486920000000	475.556776000000
99.7672840000000	101.928296000000	71.5285990000000	475.439906000000
101.750408000000	101.335082000000	72.8939490000000	474.557400000000
100.261599000000	102.169731000000	67.2075390000000	474.777535000000
101.273059000000	102.176123000000	71.0658050000000	473.948628000000
97.9748710000000	99.7625400000000	69.6957560000000	474.677384000000
99.4876320000000	99.7807000000000	71.1782830000000	475.266978000000
102.343992000000	100.430468000000	69.1764750000000	475.243539000000
102.576650000000	98.5267130000000	68.5849710000000	474.455938000000
103.366426000000	99.4146770000000	68.8493740000000	473.512292000000
99.8676050000000	99.8245220000000	72.4516870000000	475.470558000000
96.7651390000000	99.4685950000000	71.1113130000000	474.416599000000
95.8456090000000	100.903755000000	70.3809440000000	474.199578000000
101.937222000000	99.5983090000000	71.5459020000000	476.180792000000
101.910464000000	102.357131000000	65.8403970000000	474.809498000000
96.4950210000000	102.159308000000	66.2567560000000	475.185350000000
99.7768010000000	101.602086000000	66.6578690000000	475.290090000000
99.2937410000000	100.846830000000	71.5946240000000	475.168303000000
100.606119000000	99.1637810000000	66.1606710000000	474.264324000000
102.242151000000	100.474978000000	65.7816150000000	474.537730000000
100.837902000000	101.096743000000	67.2344730000000	474.668369000000
100.992170000000	101.898872000000	70.0719610000000	475.843623000000
104.914533000000	101.822115000000	70.2829780000000	475.553334000000
101.979776000000	100.977107000000	62.7529710000000	475.372046000000
99.1274280000000	101.571722000000	63.6846460000000	473.898798000000
100.862998000000	102.080564000000	64.9019020000000	475.768715000000
103.260737000000	103.009929000000	70.2143110000000	475.003242000000
102.320748000000	101.958175000000	72.1999430000000	476.583198000000
103.070596000000	100.146985000000	70.9277590000000	499.112681000000
100.966684000000	102.080137000000	72.7883530000000	500.730827000000
103.323811000000	102.603172000000	74.3263290000000	498.937622000000
104.654548000000	102.971278000000	71.6782770000000	499.966502000000
107.436301000000	102.671373000000	71.6940330000000	499.222994000000
106.520833000000	103.116894000000	72.2210950000000	499.415100000000
105.696453000000	104.101433000000	74.1482020000000	498.784855000000
102.504732000000	105.074782000000	73.5662590000000	499.942407000000
104.450805000000	105.642062000000	73.0679200000000	499.698013000000
104.219472000000	105.165861000000	72.8889600000000	499.009743000000
105.394626000000	101.692957000000	70.2388250000000	501.134381000000
104.825986000000	100.143899000000	73.0416930000000	499.904215000000
99.2639700000000	101.777521000000	74.4259230000000	501.249939000000
105.164812000000	104.042486000000	69.1462660000000	500.073701000000
102.682964000000	103.131845000000	70.2386250000000	500.581667000000
106.432470000000	102.896544000000	74.7086780000000	499.274462000000
106.090458000000	103.477066000000	74.7710600000000	501.064554000000
102.342758000000	103.182658000000	70.2655040000000	498.555705000000
104.300513000000	104.919701000000	67.2631870000000	501.105040000000
101.198782000000	104.612626000000	73.6814600000000	499.335438000000
105.560985000000	102.503229000000	68.2397580000000	500.567898000000
100.828791000000	103.540022000000	70.0398410000000	498.898119000000
103.203341000000	104.098396000000	72.1366860000000	499.884546000000
102.280121000000	104.691561000000	68.0424730000000	500.696570000000
101.444306000000	105.059927000000	69.3894880000000	499.886349000000
104.903876000000	104.221269000000	69.7299690000000	502.341107000000
105.118751000000	104.157385000000	73.1938680000000	497.626975000000
104.781204000000	102.198636000000	74.6433650000000	500.871137000000
102.362615000000	102.236704000000	74.7133260000000	500.756726000000
102.495975000000	102.236551000000	72.8915160000000	500.890970000000
105.156855000000	102.653351000000	69.4745990000000	499.284297000000
105.993018000000	104.789476000000	71.5650460000000	498.934999000000
100.864255000000	101.083936000000	76.0971150000000	500.374809000000
101.990188000000	101.737390000000	73.5572650000000	500.692964000000
102.280174000000	102.707335000000	74.3436680000000	499.581635000000
103.030998000000	103.298693000000	74.3222060000000	499.216765000000
103.390929000000	104.050152000000	76.4250810000000	500.330389000000
104.611510000000	103.746043000000	71.2093860000000	499.658346000000
101.696688000000	103.472516000000	72.5888610000000	499.491647000000
104.701795000000	103.481118000000	69.5777740000000	500.877857000000
106.394508000000	103.373185000000	73.4799800000000	499.364778000000
103.552965000000	104.983545000000	71.3968930000000	499.311835000000
104.035687000000	105.265207000000	69.4917810000000	499.511644000000
104.053234000000	106.610232000000	69.8466240000000	500.562489000000
104.695218000000	106.091098000000	69.4804970000000	499.734730000000
103.248180000000	105.194411000000	74.5659800000000	500.247613000000
103.264357000000	102.232071000000	74.0275980000000	499.996826000000
99.7683950000000	103.971342000000	72.3662910000000	500.227943000000
93.3405580000000	103.527006000000	69.8151320000000	499.608189000000
90.7644140000000	103.027950000000	69.6954230000000	499.811769000000
103.767051000000	103.766397000000	69.7568350000000	499.850124000000
105.344066000000	103.681297000000	71.0670240000000	498.769447000000
105.640730000000	104.547830000000	73.5778400000000	500.186801000000
105.931220000000	104.743441000000	72.0966070000000	497.657791000000
101.242042000000	104.844876000000	70.7368110000000	501.357466000000
103.497969000000	102.733128000000	75.2094460000000	499.772921000000
105.682849000000	105.024921000000	70.6246760000000	500.517741000000
107.164575000000	105.398869000000	72.5270760000000	498.985156000000
106.884253000000	105.213204000000	72.5938470000000	500.139594000000
106.851536000000	105.865665000000	74.4820090000000	501.355663000000
105.049362000000	105.671782000000	78.1202640000000	501.669392000000
98.2731970000000	104.889528000000	76.2931430000000	500.268593000000
102.284138000000	105.431601000000	70.7915310000000	498.971716000000
107.488882000000	99.0716640000000	71.4368530000000	499.216765000000
103.571738000000	100.872059000000	69.3102970000000	499.157920000000
105.126999000000	102.741100000000	72.5191740000000	501.501381000000
103.329664000000	104.596130000000	65.6649690000000	498.951718000000
97.1685730000000	103.916557000000	64.4375230000000	500.316948000000
100.336011000000	103.369199000000	71.1357020000000	500.070915000000
104.308770000000	102.691038000000	69.6670520000000	499.285772000000
104.961534000000	102.431791000000	73.4821920000000	500.252202000000
100.710032000000	103.231532000000	74.1520580000000	500.289738000000
103.444261000000	104.040805000000	73.6650950000000	500.018790000000
103.286278000000	104.666512000000	75.3154780000000	499.163002000000
104.877563000000	103.321736000000	76.6884980000000	500.436768000000
107.402574000000	104.340232000000	75.4960930000000	500.612974000000
101.432552000000	101.775202000000	68.3745520000000	500.009283000000
101.385358000000	101.751203000000	66.6605880000000	499.230206000000
105.552072000000	102.709469000000	68.0033040000000	497.143924000000
101.597392000000	103.893018000000	68.6933680000000	499.541476000000
101.743838000000	102.850064000000	68.0684940000000	501.425490000000
103.065985000000	104.044129000000	69.3097530000000	499.121204000000
101.449830000000	104.761568000000	68.9842260000000	501.077339000000
106.235819000000	104.728145000000	67.0667660000000	500.616416000000
107.199229000000	104.121649000000	67.5251780000000	499.922246000000
104.625275000000	104.717773000000	70.2466130000000	500.998005000000
103.655633000000	104.923768000000	70.9351920000000	500.229254000000
104.709776000000	104.891953000000	70.5568650000000	501.421228000000
104.373352000000	105.394718000000	74.4194680000000	499.440670000000
103.059262000000	103.278734000000	70.8161750000000	500.818193000000
103.736947000000	103.898650000000	71.0001530000000	499.093994000000
105.459071000000	104.814067000000	70.6230190000000	500.016332000000
101.805280000000	104.537702000000	71.7319370000000	500.054523000000
103.277705000000	105.253140000000	72.9373770000000	499.607369000000
107.222998000000	99.0137070000000	73.2880190000000	499.850944000000
107.373662000000	99.0455010000000	70.8975600000000	499.972075000000
100.117816000000	101.826186000000	73.6034970000000	499.918640000000
103.446476000000	103.493398000000	73.3147240000000	500.495121000000
105.235428000000	104.151075000000	74.4352430000000	499.334127000000
103.407027000000	104.243290000000	75.5620000000000	499.672771000000
106.028913000000	103.160963000000	78.3003300000000	500.454143000000
104.317065000000	104.403958000000	77.3165830000000	498.609632000000
103.569140000000	104.824043000000	72.7934130000000	499.120384000000
104.129394000000	105.286399000000	74.9408860000000	498.630285000000
103.081999000000	105.197382000000	73.1190090000000	500.286460000000
106.497589000000	105.526775000000	66.2262740000000	499.627858000000
106.068121000000	105.584025000000	69.4848000000000	500.383988000000
103.870897000000	105.211869000000	71.3101680000000	500.546426000000
104.756586000000	100.619151000000	74.9726780000000	500.984401000000
102.791796000000	100.802338000000	70.8797160000000	499.138251000000
106.440722000000	101.880167000000	71.2947960000000	499.819309000000
105.434333000000	101.909656000000	74.7832330000000	500.371695000000
102.830313000000	104.017185000000	75.3397640000000	501.752660000000
103.215733000000	105.391929000000	74.1308020000000	498.001844000000
101.828459000000	104.665971000000	76.1599960000000	501.024067000000
105.102356000000	103.000505000000	71.3731280000000	500.503644000000
100.556339000000	102.825380000000	66.0404580000000	502.637461000000
103.432841000000	105.786495000000	70.6357750000000	499.078915000000
101.648749000000	102.047126000000	74.0048080000000	499.912739000000
105.140529000000	101.907684000000	76.2469830000000	500.425786000000
105.120456000000	102.239149000000	73.9653940000000	499.795541000000
102.975626000000	104.772610000000	73.0547760000000	499.724075000000
99.0739440000000	104.826513000000	72.6380070000000	499.184147000000
102.210259000000	104.918493000000	70.0233230000000	500.778854000000
106.957680000000	103.854927000000	71.7890730000000	499.002367000000
105.457027000000	105.124984000000	71.8208520000000	502.075732000000
106.519233000000	104.466277000000	71.5006210000000	499.742761000000
105.168177000000	101.867280000000	69.4832750000000	499.582455000000
104.602495000000	102.438034000000	70.2505040000000	502.123758000000
104.755638000000	104.633595000000	70.8422030000000	498.881400000000
102.073364000000	104.772082000000	73.0286920000000	499.079898000000
105.045979000000	104.582276000000	75.6725520000000	498.434901000000
106.071101000000	103.864442000000	75.9408020000000	501.082584000000
104.744862000000	104.322643000000	72.8664270000000	499.911264000000
105.220237000000	104.583345000000	71.5622560000000	499.516889000000
105.117135000000	103.429799000000	75.0537450000000	502.080813000000
105.406873000000	100.795783000000	69.3121580000000	499.679163000000
103.495108000000	102.316967000000	71.8230910000000	498.698637000000
101.939876000000	103.465785000000	73.3825960000000	500.229418000000
104.958636000000	104.849346000000	74.2804740000000	501.369432000000
101.617431000000	104.119582000000	73.2470660000000	499.359369000000
102.096005000000	103.322415000000	71.3375320000000	499.511480000000
103.451018000000	101.220325000000	72.4602870000000	499.285609000000
106.913085000000	99.1941060000000	75.3145870000000	500.426605000000
103.418709000000	102.261948000000	67.3953780000000	499.775052000000
105.444931000000	103.677890000000	66.2563900000000	498.731747000000
103.781669000000	101.967481000000	68.8343460000000	499.016300000000
95.7074510000000	103.134446000000	72.1623230000000	501.800850000000
104.789414000000	105.223874000000	73.9013120000000	500.806063000000
104.834637000000	104.691938000000	75.9587440000000	499.294952000000
104.982018000000	105.803752000000	73.6966600000000	498.716503000000
102.985104000000	104.337372000000	71.7621820000000	501.101106000000
99.4480650000000	103.754406000000	71.5677540000000	498.605698000000
106.662661000000	104.164936000000	71.8264960000000	499.096945000000
105.067772000000	105.312631000000	75.0216130000000	499.619827000000
103.097304000000	104.640046000000	76.0571160000000	499.750301000000
104.313140000000	102.839427000000	76.7590610000000	501.017839000000
97.2966490000000	100.984409000000	76.6032630000000	500.210896000000
102.429991000000	103.870563000000	72.4559990000000	501.017347000000
101.397785000000	103.766389000000	74.3709400000000	500.615433000000
100.614900000000	105.648371000000	72.9997410000000	500.314489000000
103.955934000000	105.601104000000	74.9552640000000	498.080522000000
104.015293000000	105.820303000000	66.5280040000000	500.988826000000
105.930270000000	105.382044000000	67.7660730000000	499.224305000000
105.238830000000	102.580812000000	70.0262410000000	500.699684000000
101.718184000000	101.850849000000	72.4137640000000	500.449061000000
98.6581750000000	103.772020000000	73.2838060000000	500.119433000000
97.4973930000000	102.749036000000	71.6515680000000	500.305146000000
105.004603000000	102.115448000000	71.0156940000000	500.179753000000
98.3399030000000	103.823808000000	72.2040670000000	500.452504000000
