# Supplementary material for: Soft Sensing of Non-Newtonian Fluid Flow in Open Venturi Channel Using an Array of Ultrasonic Level Sensors—AI Models and Their Validations
Source: Sensors (Basel). 2017 Oct 26;17(11):2458. doi: 10.3390/s17112458 (PMC5713661; doi:10.3390/s17112458)
Supplement: Supplementary file 1 [file sensors-17-02458-s001.zip › Data Set/Repeatability Test Data Experiment #2.txt]

LT-1, LT-2, LT-3, Coriolis mass flow readings, Setpoints
73.1830000000000	71.2260000000000	47.9920000000000	274.716000000000	275
73.0120000000000	71.1130000000000	48.2980000000000	275.161000000000	275
72.8920000000000	71.0230000000000	46.1870000000000	274.695000000000	275
73.0110000000000	71.5530000000000	46.5710000000000	275.997000000000	275
72.2750000000000	70.6450000000000	46.2500000000000	275.679000000000	275
71.1690000000000	69.8280000000000	45.9090000000000	276.183000000000	275
71.2040000000000	70.0290000000000	46.8430000000000	277.507000000000	275
71.5400000000000	70.7370000000000	47.4290000000000	276.783000000000	275
71.8450000000000	70.9430000000000	47.7560000000000	275.275000000000	275
72.1190000000000	70.8800000000000	47.3000000000000	273.752000000000	275
72.5250000000000	70.8610000000000	47.1340000000000	274.712000000000	275
73.3390000000000	71.3030000000000	46.1680000000000	275.399000000000	275
73.4220000000000	71.1650000000000	47.0290000000000	275.292000000000	275
73.5760000000000	70.9980000000000	47.6880000000000	275.387000000000	275
73.9560000000000	70.9660000000000	48.1720000000000	274.903000000000	275
74.2370000000000	70.8550000000000	47.4420000000000	274.686000000000	275
74.0200000000000	70.4920000000000	46.4990000000000	273.414000000000	275
74.1300000000000	70.5360000000000	46.4420000000000	275.397000000000	275
74.5640000000000	70.4750000000000	46.8100000000000	274.972000000000	275
74.0320000000000	70.1530000000000	47.0310000000000	273.880000000000	275
77.3940000000000	76.1400000000000	46.5690000000000	299.681000000000	300
77.2620000000000	75.8790000000000	47.6720000000000	299.248000000000	300
77.4980000000000	75.4470000000000	48.4700000000000	301.113000000000	300
77.1100000000000	75.2610000000000	48.8690000000000	302.300000000000	300
76.6970000000000	75.1550000000000	48.8980000000000	300.980000000000	300
77.1430000000000	75.1160000000000	49.3940000000000	300.446000000000	300
77.7230000000000	75.3690000000000	50.0770000000000	299.859000000000	300
77.5980000000000	75.1280000000000	51.1610000000000	299.944000000000	300
77.4360000000000	75.0820000000000	51.9300000000000	299.727000000000	300
77.5780000000000	75.0400000000000	51.8240000000000	298.837000000000	300
77.6830000000000	74.9330000000000	51.4990000000000	298.670000000000	300
77.4200000000000	74.8490000000000	51.8590000000000	299.246000000000	300
77.2120000000000	74.2120000000000	51.4170000000000	300.983000000000	300
76.8220000000000	74.1910000000000	50.0850000000000	300.449000000000	300
77.3990000000000	74.4780000000000	49.4430000000000	300.816000000000	300
77.7920000000000	74.6240000000000	49.1690000000000	299.953000000000	300
78.0850000000000	74.7060000000000	49.5910000000000	300.570000000000	300
78.4380000000000	74.8480000000000	50.2980000000000	300.330000000000	300
78.5930000000000	75.1330000000000	50.1680000000000	300.578000000000	300
78.3600000000000	75.2570000000000	49.9250000000000	300.990000000000	300
79.9460000000000	77.9800000000000	50.9330000000000	323.630000000000	325
80.1090000000000	78.2760000000000	51.0460000000000	324.508000000000	325
80.0280000000000	78.6920000000000	51.3530000000000	324.754000000000	325
79.9050000000000	78.3080000000000	52.0690000000000	325.901000000000	325
80.0250000000000	77.6670000000000	51.7950000000000	325.476000000000	325
80.2900000000000	77.7050000000000	51.9650000000000	325.509000000000	325
80.6570000000000	78.2220000000000	52.0580000000000	324.572000000000	325
80.7350000000000	78.3990000000000	51.1850000000000	324.475000000000	325
81.0770000000000	78.8730000000000	51.5210000000000	324.439000000000	325
81.7500000000000	79.3580000000000	51.5890000000000	324.299000000000	325
82.0160000000000	79.9150000000000	51.5800000000000	323.435000000000	325
81.9800000000000	79.9680000000000	52.2070000000000	324.526000000000	325
81.7180000000000	80.1570000000000	52.8920000000000	324.832000000000	325
81.7810000000000	80.3610000000000	52.5600000000000	325.311000000000	325
81.9260000000000	80.3920000000000	48.5070000000000	324.231000000000	325
81.7840000000000	80.4170000000000	47.0050000000000	324.518000000000	325
81.7740000000000	80.6440000000000	47.4260000000000	326.008000000000	325
81.8900000000000	80.7910000000000	47.7060000000000	326.096000000000	325
81.5180000000000	80.3730000000000	48.8310000000000	324.263000000000	325
81.0820000000000	79.8490000000000	50.3310000000000	323.598000000000	325
85.9200000000000	83.1600000000000	50.3470000000000	350.318000000000	350
85.4520000000000	82.3790000000000	50.2850000000000	350.418000000000	350
85.2880000000000	82.0280000000000	51.5550000000000	347.738000000000	350
85.3920000000000	81.4020000000000	50.9910000000000	348.434000000000	350
85.4910000000000	81.0130000000000	50.3040000000000	349.305000000000	350
85.2860000000000	81.0930000000000	50.8060000000000	350.919000000000	350
84.9360000000000	81.3270000000000	52.5270000000000	350.348000000000	350
85.0680000000000	82.0280000000000	53.5240000000000	351.032000000000	350
84.6910000000000	82.0990000000000	52.9200000000000	348.745000000000	350
84.2910000000000	82.3630000000000	52.3530000000000	349.160000000000	350
84.5190000000000	82.5520000000000	51.7120000000000	350.426000000000	350
84.9550000000000	82.7180000000000	50.0380000000000	351.263000000000	350
84.7330000000000	82.7330000000000	51.1990000000000	350.921000000000	350
84.4510000000000	82.6230000000000	52.2050000000000	351.122000000000	350
84.2850000000000	82.6770000000000	53.2220000000000	350.714000000000	350
84.4920000000000	83.1340000000000	54.1620000000000	349.679000000000	350
84.5460000000000	83.2790000000000	52.8250000000000	349.321000000000	350
84.5950000000000	83.0320000000000	53.5620000000000	349.220000000000	350
84.6530000000000	82.5510000000000	48.2050000000000	350.936000000000	350
85.0520000000000	82.4150000000000	45.1720000000000	350.953000000000	350
88.1570000000000	84.5110000000000	56.0750000000000	375.754000000000	375
87.9730000000000	84.4650000000000	55.1770000000000	374.929000000000	375
87.9100000000000	84.4210000000000	55.0110000000000	374.486000000000	375
88.2500000000000	84.5490000000000	54.3700000000000	374.313000000000	375
88.6100000000000	84.3310000000000	55.5790000000000	374.871000000000	375
88.3590000000000	84.1610000000000	56.4620000000000	376.071000000000	375
88.0410000000000	84.1180000000000	56.3990000000000	375.093000000000	375
87.7670000000000	84.5170000000000	54.2700000000000	375.095000000000	375
88.0260000000000	85.1680000000000	54.8850000000000	374.255000000000	375
87.7110000000000	85.1680000000000	56.6400000000000	374.838000000000	375
88.0510000000000	85.1120000000000	57.6640000000000	374.946000000000	375
88.1780000000000	85.2590000000000	57.6790000000000	376.566000000000	375
88.0560000000000	85.3160000000000	57.9080000000000	376.536000000000	375
87.6870000000000	85.4030000000000	54.8320000000000	376.939000000000	375
87.7210000000000	85.8080000000000	55.7370000000000	373.780000000000	375
87.8770000000000	85.9350000000000	56.3400000000000	374.568000000000	375
88.0320000000000	85.7380000000000	56.8670000000000	375.078000000000	375
87.8700000000000	84.7200000000000	58.0130000000000	375.793000000000	375
87.7090000000000	84.6170000000000	58.1150000000000	375.221000000000	375
88.0750000000000	85.1900000000000	56.8160000000000	375.113000000000	375
92.8420000000000	88.8370000000000	61.0750000000000	399.580000000000	400
93.1510000000000	89.6580000000000	60.6600000000000	399.744000000000	400
92.7100000000000	90.0050000000000	59.1940000000000	399.512000000000	400
92	89.7580000000000	60.1260000000000	399.819000000000	400
91.7910000000000	89.7300000000000	60.7150000000000	399.597000000000	400
91.3800000000000	90.0420000000000	57.9660000000000	400.086000000000	400
90.6850000000000	90.3420000000000	56.5670000000000	399.319000000000	400
90.3840000000000	89.6940000000000	58.2300000000000	400.097000000000	400
90.3050000000000	89.8410000000000	58.9730000000000	400.830000000000	400
90.8340000000000	90.0250000000000	59.6570000000000	399.979000000000	400
90.8870000000000	90.2990000000000	59.4880000000000	399.701000000000	400
90.8670000000000	90.1570000000000	59.7920000000000	398.742000000000	400
90.8120000000000	90.0260000000000	59.9290000000000	398.930000000000	400
90.8730000000000	90.3370000000000	60.5890000000000	400.942000000000	400
90.9620000000000	90.6030000000000	61.3430000000000	401.286000000000	400
91.0760000000000	90.7000000000000	61.2850000000000	401.961000000000	400
91.3560000000000	90.5370000000000	60.8050000000000	401.491000000000	400
91.1930000000000	90.5970000000000	61.1880000000000	400.759000000000	400
91.5220000000000	90.4520000000000	61.8660000000000	399.997000000000	400
91.4310000000000	90.2070000000000	62.1690000000000	399.665000000000	400
94.3030000000000	92.0110000000000	61.8450000000000	423.414000000000	425
94.8490000000000	91.9630000000000	61.8810000000000	422.967000000000	425
94.7900000000000	91.5950000000000	60.2850000000000	426.365000000000	425
94.9340000000000	91.7930000000000	59.4690000000000	426.787000000000	425
95.1750000000000	92.2110000000000	60.6810000000000	427.729000000000	425
95.1800000000000	92.3560000000000	61.5800000000000	425.938000000000	425
95.0340000000000	92.4970000000000	62.6250000000000	425.303000000000	425
94.8600000000000	92.2400000000000	63.4770000000000	424.665000000000	425
94.9970000000000	92.0510000000000	63.1010000000000	426.421000000000	425
94.7990000000000	91.8100000000000	61.6650000000000	425.462000000000	425
94.5390000000000	91.7170000000000	61.5170000000000	425.576000000000	425
94.5570000000000	91.7560000000000	62.4910000000000	425.024000000000	425
94.2210000000000	91.5800000000000	63.0320000000000	424.840000000000	425
94.1650000000000	91.3740000000000	63.4270000000000	424.932000000000	425
94.4160000000000	91.2830000000000	63.6820000000000	423.981000000000	425
94.4650000000000	90.4050000000000	64.2570000000000	424.034000000000	425
94.5790000000000	90.0420000000000	61.1170000000000	424.152000000000	425
94.3150000000000	90.4040000000000	60.9080000000000	424.583000000000	425
94.3490000000000	90.6540000000000	61.6220000000000	424.464000000000	425
94.4530000000000	90.1890000000000	63.0870000000000	423.514000000000	425
98.1930000000000	95.3000000000000	65.2550000000000	449.392000000000	450
98.0930000000000	95.3990000000000	65.9510000000000	448.412000000000	450
97.7530000000000	95.7200000000000	66.9960000000000	448.195000000000	450
97.4490000000000	96.0680000000000	64.4110000000000	450.029000000000	450
97.8020000000000	96.3880000000000	64.7590000000000	449.466000000000	450
96.9850000000000	96.5780000000000	65.6120000000000	450.583000000000	450
97.1200000000000	96.3050000000000	65.4140000000000	451.396000000000	450
97.5050000000000	96.2540000000000	64.6960000000000	450.780000000000	450
97.1990000000000	96.0570000000000	65.3540000000000	450.849000000000	450
97.2030000000000	95.1970000000000	64.9680000000000	450.958000000000	450
97.0790000000000	94.4610000000000	64.7410000000000	450.223000000000	450
96.8740000000000	93.7940000000000	64.2220000000000	449.425000000000	450
96.4040000000000	93.5690000000000	63.8560000000000	449.687000000000	450
96.6780000000000	93.6960000000000	64.5560000000000	450.639000000000	450
96.7900000000000	93.8740000000000	62.1360000000000	450.197000000000	450
96.5830000000000	94.0310000000000	60.5740000000000	449.572000000000	450
97.1040000000000	94.2750000000000	60.6570000000000	449.704000000000	450
97.4540000000000	94.4480000000000	60.0730000000000	449.271000000000	450
97.5800000000000	93.9750000000000	61.2730000000000	449.179000000000	450
97.4910000000000	94.4940000000000	61.5500000000000	450.972000000000	450
