# Supplementary material for: Soft Sensing of Non-Newtonian Fluid Flow in Open Venturi Channel Using an Array of Ultrasonic Level Sensors—AI Models and Their Validations
Source: Sensors (Basel). 2017 Oct 26;17(11):2458. doi: 10.3390/s17112458 (PMC5713661; doi:10.3390/s17112458)
Supplement: Supplementary file 1 [file sensors-17-02458-s001.zip › Data Set/Repeatability Test Data Experiment #3.txt]

LT-1, LT-2, LT-3, Coriolis mass flow readings, Setpoints
71.1690000000000	69.8280000000000	45.9090000000000	276.183000000000	275
71.2040000000000	70.0290000000000	46.8430000000000	277.507000000000	275
71.5400000000000	70.7370000000000	47.4290000000000	276.783000000000	275
71.8450000000000	70.9430000000000	47.7560000000000	275.275000000000	275
72.1190000000000	70.8800000000000	47.3000000000000	273.752000000000	275
72.5250000000000	70.8610000000000	47.1340000000000	274.712000000000	275
73.3390000000000	71.3030000000000	46.1680000000000	275.399000000000	275
73.4220000000000	71.1650000000000	47.0290000000000	275.292000000000	275
73.5760000000000	70.9980000000000	47.6880000000000	275.387000000000	275
73.9560000000000	70.9660000000000	48.1720000000000	274.903000000000	275
74.2370000000000	70.8550000000000	47.4420000000000	274.686000000000	275
74.0200000000000	70.4920000000000	46.4990000000000	273.414000000000	275
74.1300000000000	70.5360000000000	46.4420000000000	275.397000000000	275
74.5640000000000	70.4750000000000	46.8100000000000	274.972000000000	275
74.0320000000000	70.1530000000000	47.0310000000000	273.880000000000	275
73.0840000000000	70.0260000000000	46.8170000000000	274.979000000000	275
72.7820000000000	70.0790000000000	46.1910000000000	272.856000000000	275
73.0410000000000	70.6190000000000	46.0360000000000	273.884000000000	275
73.5240000000000	70.8040000000000	46.1450000000000	274.510000000000	275
73.4460000000000	70.9230000000000	46.1820000000000	274.845000000000	275
76.6540000000000	75.2040000000000	49.0710000000000	300.494000000000	300
76.9210000000000	75.1090000000000	49.1130000000000	299.881000000000	300
76.8040000000000	75.5300000000000	49.9920000000000	300.983000000000	300
76.8080000000000	75.5370000000000	50.8080000000000	300.434000000000	300
76.8340000000000	75.8840000000000	51.1010000000000	299.310000000000	300
77.3560000000000	75.8180000000000	51.2260000000000	298.398000000000	300
77.4110000000000	75.3990000000000	50.9790000000000	298.117000000000	300
77.0680000000000	74.5990000000000	50.4600000000000	300.127000000000	300
76.9820000000000	74.5860000000000	50.5150000000000	299.094000000000	300
77.0830000000000	74.1730000000000	50.6240000000000	299.615000000000	300
77.1410000000000	73.7020000000000	50.4440000000000	301.298000000000	300
77.0460000000000	73.8990000000000	47.7430000000000	300.047000000000	300
77.0420000000000	73.8660000000000	45.1240000000000	300.041000000000	300
76.9610000000000	74.2640000000000	43.8490000000000	300.260000000000	300
76.9710000000000	74.4830000000000	44.1790000000000	301.190000000000	300
76.7600000000000	74.6040000000000	44.2530000000000	299.743000000000	300
76.8010000000000	74.8320000000000	45.6180000000000	299.901000000000	300
77.3000000000000	75.1440000000000	46.7620000000000	300.199000000000	300
77.3770000000000	75.3300000000000	48.0140000000000	300.407000000000	300
77.2540000000000	75.6560000000000	48.8900000000000	300.837000000000	300
78.8690000000000	77.4270000000000	51.8650000000000	325.444000000000	325
78.9690000000000	77.6920000000000	51.9810000000000	324.461000000000	325
79.3550000000000	77.6530000000000	51.7290000000000	326.233000000000	325
79.3550000000000	77.5730000000000	52.1190000000000	325.896000000000	325
79.5510000000000	77.7260000000000	52.6650000000000	323.485000000000	325
79.7340000000000	77.3500000000000	52.9880000000000	323.875000000000	325
80.2780000000000	77.4070000000000	52.4440000000000	326.407000000000	325
80.2640000000000	77.7100000000000	52.7370000000000	325.216000000000	325
79.8890000000000	78.3400000000000	53.4830000000000	324.321000000000	325
79.4350000000000	78.3640000000000	54.0670000000000	324.922000000000	325
79.7700000000000	78	53.1470000000000	325.023000000000	325
80.1330000000000	78.1070000000000	52.6900000000000	325.525000000000	325
80.3650000000000	78.1790000000000	52.6900000000000	326.796000000000	325
80.6100000000000	78.3900000000000	52.4040000000000	325.144000000000	325
80.5600000000000	78.8840000000000	51.2070000000000	324.848000000000	325
81.1180000000000	78.9100000000000	52.2070000000000	324.604000000000	325
80.9180000000000	78.6220000000000	51.9590000000000	324.715000000000	325
81.0090000000000	78.7780000000000	50.4770000000000	324.593000000000	325
81.4110000000000	78.8140000000000	49.1760000000000	322.737000000000	325
81.7460000000000	78.8370000000000	49.6010000000000	323.287000000000	325
83.6370000000000	80.3740000000000	54.6710000000000	350.070000000000	350
83.5740000000000	81.0360000000000	53.6730000000000	350.640000000000	350
83.3190000000000	81.4630000000000	52.9100000000000	351.381000000000	350
82.9170000000000	81.1260000000000	53.3690000000000	350.663000000000	350
83.1450000000000	80.7720000000000	53.8670000000000	350.001000000000	350
83.1820000000000	81.3030000000000	53.7240000000000	349.175000000000	350
83.3100000000000	81.3250000000000	54.1970000000000	348.233000000000	350
83.5030000000000	81.3420000000000	55.2650000000000	349.542000000000	350
83.6340000000000	81.5610000000000	54.7900000000000	350.661000000000	350
83.8330000000000	82.0100000000000	54.6940000000000	351.079000000000	350
84.0180000000000	82.7050000000000	52.2340000000000	349.765000000000	350
84.2010000000000	83.0700000000000	51.1100000000000	350.643000000000	350
84.4790000000000	83.2560000000000	52.1610000000000	350.271000000000	350
85.1520000000000	83.1430000000000	52.0300000000000	350.387000000000	350
85.5960000000000	83.4690000000000	52.6930000000000	351.066000000000	350
85.8200000000000	82.5980000000000	54.6120000000000	350.353000000000	350
86.0600000000000	82.0870000000000	54.2660000000000	349.549000000000	350
86.4750000000000	82.1770000000000	52.1220000000000	349.831000000000	350
86.8510000000000	82.4870000000000	53.0200000000000	349.294000000000	350
86.9270000000000	82.3330000000000	53.9810000000000	349.052000000000	350
86.8600000000000	85.5340000000000	56.5780000000000	375.594000000000	375
86.7190000000000	85.5670000000000	55.9630000000000	374.808000000000	375
86.9330000000000	85.9320000000000	56.0990000000000	374.951000000000	375
87.4300000000000	85.8760000000000	56.6600000000000	374.686000000000	375
87.3130000000000	85.5730000000000	57.8060000000000	375.892000000000	375
87.5170000000000	84.9250000000000	58.0580000000000	375.396000000000	375
88.2700000000000	84.5470000000000	57.4420000000000	375.023000000000	375
88.8750000000000	84.7100000000000	57.8070000000000	373.524000000000	375
89.2560000000000	84.9140000000000	58.7910000000000	374.026000000000	375
88.9530000000000	84.8570000000000	58.8150000000000	374.706000000000	375
89.1770000000000	84.8890000000000	57.7450000000000	374.736000000000	375
88.8050000000000	85.1390000000000	55.5860000000000	375.846000000000	375
88.3560000000000	85.4700000000000	54.2180000000000	375.946000000000	375
88.1700000000000	85.1800000000000	54.4630000000000	374.651000000000	375
88.6030000000000	85.1620000000000	53.9830000000000	375.386000000000	375
88.8170000000000	85.1640000000000	53.7680000000000	375.088000000000	375
88.4890000000000	85.0010000000000	55.1210000000000	374.674000000000	375
88.2140000000000	84.9320000000000	56.2730000000000	374.894000000000	375
87.9830000000000	84.9680000000000	56.8550000000000	375.736000000000	375
88.2560000000000	84.6810000000000	56.5150000000000	375.477000000000	375
89.5700000000000	88.4710000000000	57.6870000000000	400.227000000000	400
89.8950000000000	88.4350000000000	58.4430000000000	401.064000000000	400
90.4270000000000	88.7330000000000	57.9500000000000	400.730000000000	400
90.8470000000000	88.8100000000000	57.7710000000000	400.509000000000	400
91.0870000000000	89.0110000000000	58.2870000000000	399.948000000000	400
91.5640000000000	89.0260000000000	58.6250000000000	399.254000000000	400
91.9930000000000	89.0790000000000	57.7110000000000	398.059000000000	400
92.1550000000000	88.7810000000000	57.8980000000000	399.589000000000	400
91.8850000000000	88.3220000000000	58.4260000000000	399.943000000000	400
91.4390000000000	88.3070000000000	57.1980000000000	400.584000000000	400
90.7260000000000	88.2610000000000	54.0760000000000	399.282000000000	400
90.6990000000000	88.1870000000000	53.0960000000000	399.187000000000	400
91.1620000000000	88.1240000000000	54.1740000000000	400.269000000000	400
91.6830000000000	88.2770000000000	56.3710000000000	400.038000000000	400
91.9030000000000	88.7990000000000	58.0460000000000	400.030000000000	400
91.8450000000000	89.2270000000000	58.9870000000000	399.387000000000	400
92.0160000000000	88.6970000000000	58.3680000000000	399.656000000000	400
92.3240000000000	87.4620000000000	58.8850000000000	399.767000000000	400
92.5120000000000	88.3010000000000	58.8050000000000	399.092000000000	400
92.6540000000000	88.5940000000000	58.8570000000000	399.430000000000	400
92.3220000000000	91.4180000000000	62.9630000000000	425.117000000000	425
92.9340000000000	91.8330000000000	63.4880000000000	425.335000000000	425
93.1800000000000	92.1760000000000	63.9310000000000	425.458000000000	425
93.2090000000000	92.5410000000000	63.9520000000000	424.021000000000	425
93.2350000000000	92.7800000000000	63.7400000000000	424.137000000000	425
92.8140000000000	93.1400000000000	63.6270000000000	423.859000000000	425
92.8070000000000	92.9120000000000	63.4730000000000	424.736000000000	425
92.9020000000000	92.4920000000000	62.4680000000000	424.322000000000	425
93.0540000000000	92.1490000000000	62.5970000000000	424.054000000000	425
93.3540000000000	91.8830000000000	61.0600000000000	424.092000000000	425
93.4290000000000	92.1920000000000	59.5490000000000	424.871000000000	425
93.0970000000000	92.6630000000000	58.5450000000000	424.901000000000	425
93.3030000000000	92.8940000000000	57.0960000000000	425.453000000000	425
93.8760000000000	93.0440000000000	55.9550000000000	425.391000000000	425
93.7200000000000	92.7590000000000	56.1880000000000	425.908000000000	425
92.8200000000000	91.5910000000000	58.1640000000000	425.123000000000	425
92.9800000000000	91.6180000000000	59.6790000000000	425.090000000000	425
93.8250000000000	92.1850000000000	57.4120000000000	425.024000000000	425
93.7600000000000	92.1790000000000	55.0210000000000	424.893000000000	425
93.8450000000000	92.0510000000000	53.6250000000000	424.841000000000	425
98.3050000000000	95.9660000000000	59.3370000000000	451.013000000000	450
97.8780000000000	95.6570000000000	60.0030000000000	450.652000000000	450
97.6520000000000	95.3230000000000	61.4640000000000	449.745000000000	450
97.4430000000000	95.0530000000000	62.7520000000000	449.822000000000	450
96.9010000000000	95.0310000000000	63.1070000000000	450.051000000000	450
96.7150000000000	95.1480000000000	63.9790000000000	451.083000000000	450
95.8030000000000	95.2850000000000	65.6490000000000	450.537000000000	450
96.5530000000000	95.4790000000000	66.3140000000000	450.005000000000	450
97.1780000000000	95.6800000000000	66.0650000000000	452.529000000000	450
97.8040000000000	95.5730000000000	65.9410000000000	451.717000000000	450
98.2880000000000	95.3070000000000	65.6410000000000	450.987000000000	450
98.5120000000000	95.6120000000000	66.2700000000000	449.560000000000	450
98.1300000000000	95.6990000000000	66.9730000000000	449.658000000000	450
97.5960000000000	95.7370000000000	67.2410000000000	449.700000000000	450
97.1580000000000	95.0120000000000	67.4300000000000	450.562000000000	450
97.1160000000000	94.4800000000000	67.9570000000000	452.618000000000	450
97.6870000000000	94.8740000000000	67.6840000000000	451.979000000000	450
97.3690000000000	95.3760000000000	66.9380000000000	450.153000000000	450
96.2870000000000	95.5830000000000	65.6420000000000	448.119000000000	450
95.9350000000000	95.4370000000000	63.9990000000000	448.133000000000	450
